# Supplementary material for: Labeling of heterochronic ribosomes reveals C1ORF109 and SPATA5 control a late step in human ribosome assembly
Source: PubMed Central journal article supplement — Cell Rep. Author manuscript; Available in PMC 2022 Apr 12. (PMC9004343; doi:10.1016/j.celrep.2022.110597), 2022-03-29
Supplement: NIHMS1793837-supplement-1.pdf [file NIHMS1793837-supplement-1.pdf]

**Cell Reports, Volume 38**

**Supplemental information**

**Labeling of heterochronic ribosomes reveals**

**C1ORF109 and SPATA5 control a late step**

**in human ribosome assembly**

**Chunyang Ni, Daniel A. Schmitz, Jeon Lee, Krzysztof Pawlowski, Jun Wu, and Michael Buszczak**

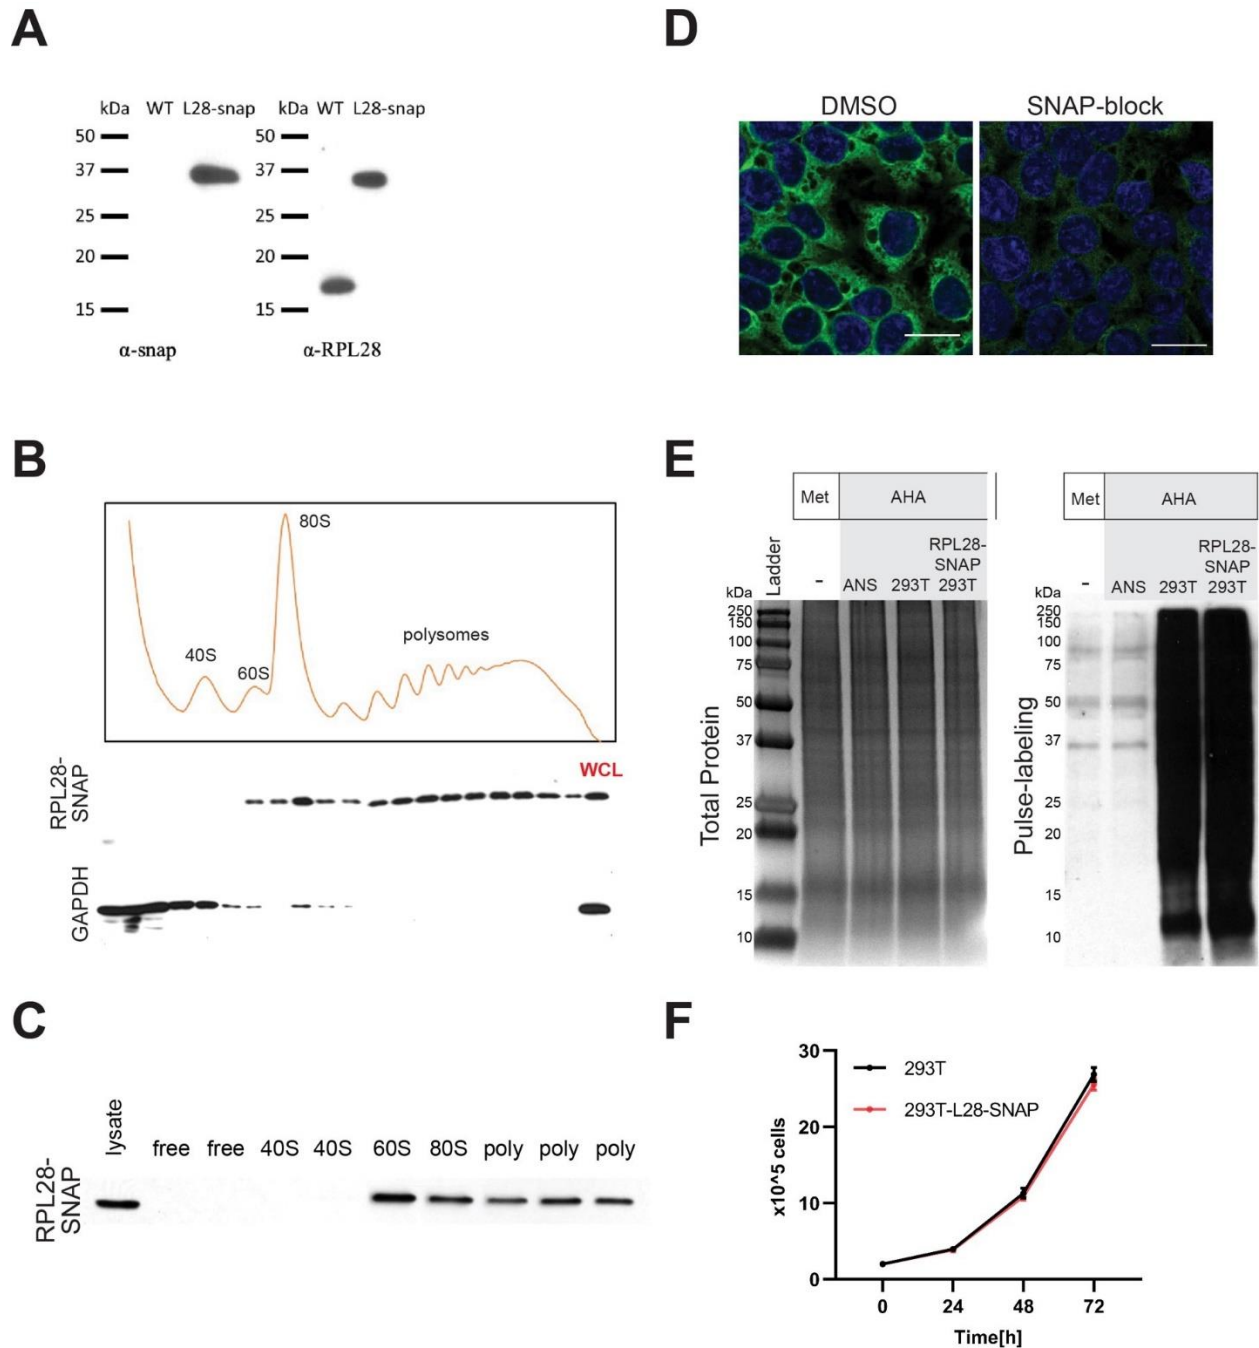

1

2

3

4

5

6

7

8

9

10

**Figure S1. Generation of cell lines carrying SNAP-tagged RPL28. Related to Figure 1.** (A) Western blots of control HEK293T cells and cells carrying a SNAP-tag at the endogenous RPL28 locus probed with the indicated antibodies. (B) Distribution of SNAP-tagged RPL28 across a sucrose gradient shows the protein co-fractionates with the 60S subunit, 80S monosome, and polysomes as expected. GAPDH is included as a free control. WCL, whole-cell lysate. (C) Distribution of SNAP-tagged RPL28 from human ESCs across a sucrose gradient. (D) HEK293T cells expressing SNAP-tagged RPL28 were treated with DMSO or unconjugated benzylguanine (SNAP-block) and then labeled with benzylguanine-Oregon green for 30 minutes. Treatment with

11 benzylguanine “blocks” the labeling of pre-existing ribosomes. Scale bars represent  
12 20µm. (E) Wild type HEK293T or HEK293T-RPL28-SNAP cells were pulse-labeled with  
13 Methionine, or AHA, or AHA with anisomycin (ANS) for 3h. Protein extract was labeled  
14 with biotin and analyzed by blotting with HRP-Streptavidin. The unfixed total protein  
15 staining demonstrates equal loading. (F) Wildtype HEK293T or HEK293T-RPL28-SNAP  
16 cells were seeded at  $2.0 \times 10^5$  cells and were counted 24, 48, 72h after seeding. (n=6  
17 counts per time point). Mean  $\pm$  S.E.M. is shown.  
18

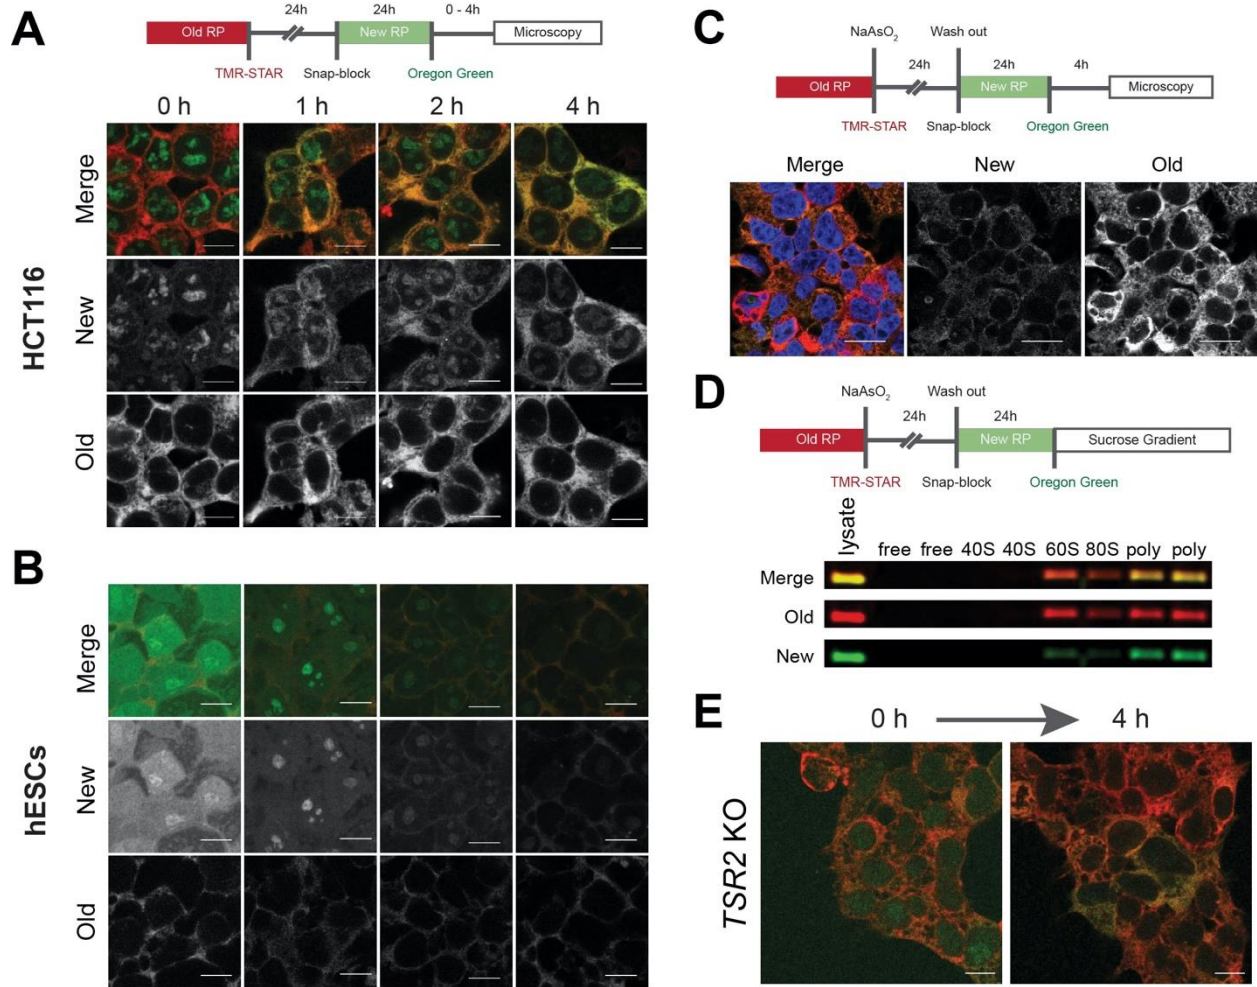

**Figure S2. Pulse-chase experiments examining the distribution of old and new RPL28 in HCT116 and H9 cells. (Related to Figure 1)** (A) HCT116 and (B) hESCs pulse-labeled as indicated in the schematic. All imaging was conducted using the same parameters. Scale bars represent 10  $\mu\text{m}$ . (C) The distribution of old and new ribosomes in HEK293T cells treated with  $\text{NaAsO}_2$ . Scale bars represent 20  $\mu\text{m}$ . (D) 60S subunits present during  $\text{NaAsO}_2$  treatment accumulated in the 60S and polysome fractions, whereas ribosomes generated after the treatment are more readily recruited into the polysome fractions. (E) Cells carrying SNAP-tagged RPL28 transduced with sgRNAs targeting TSR2 and subjected to pulse-labeling.

19

20

21

22

23

24

25

26

27

28

29

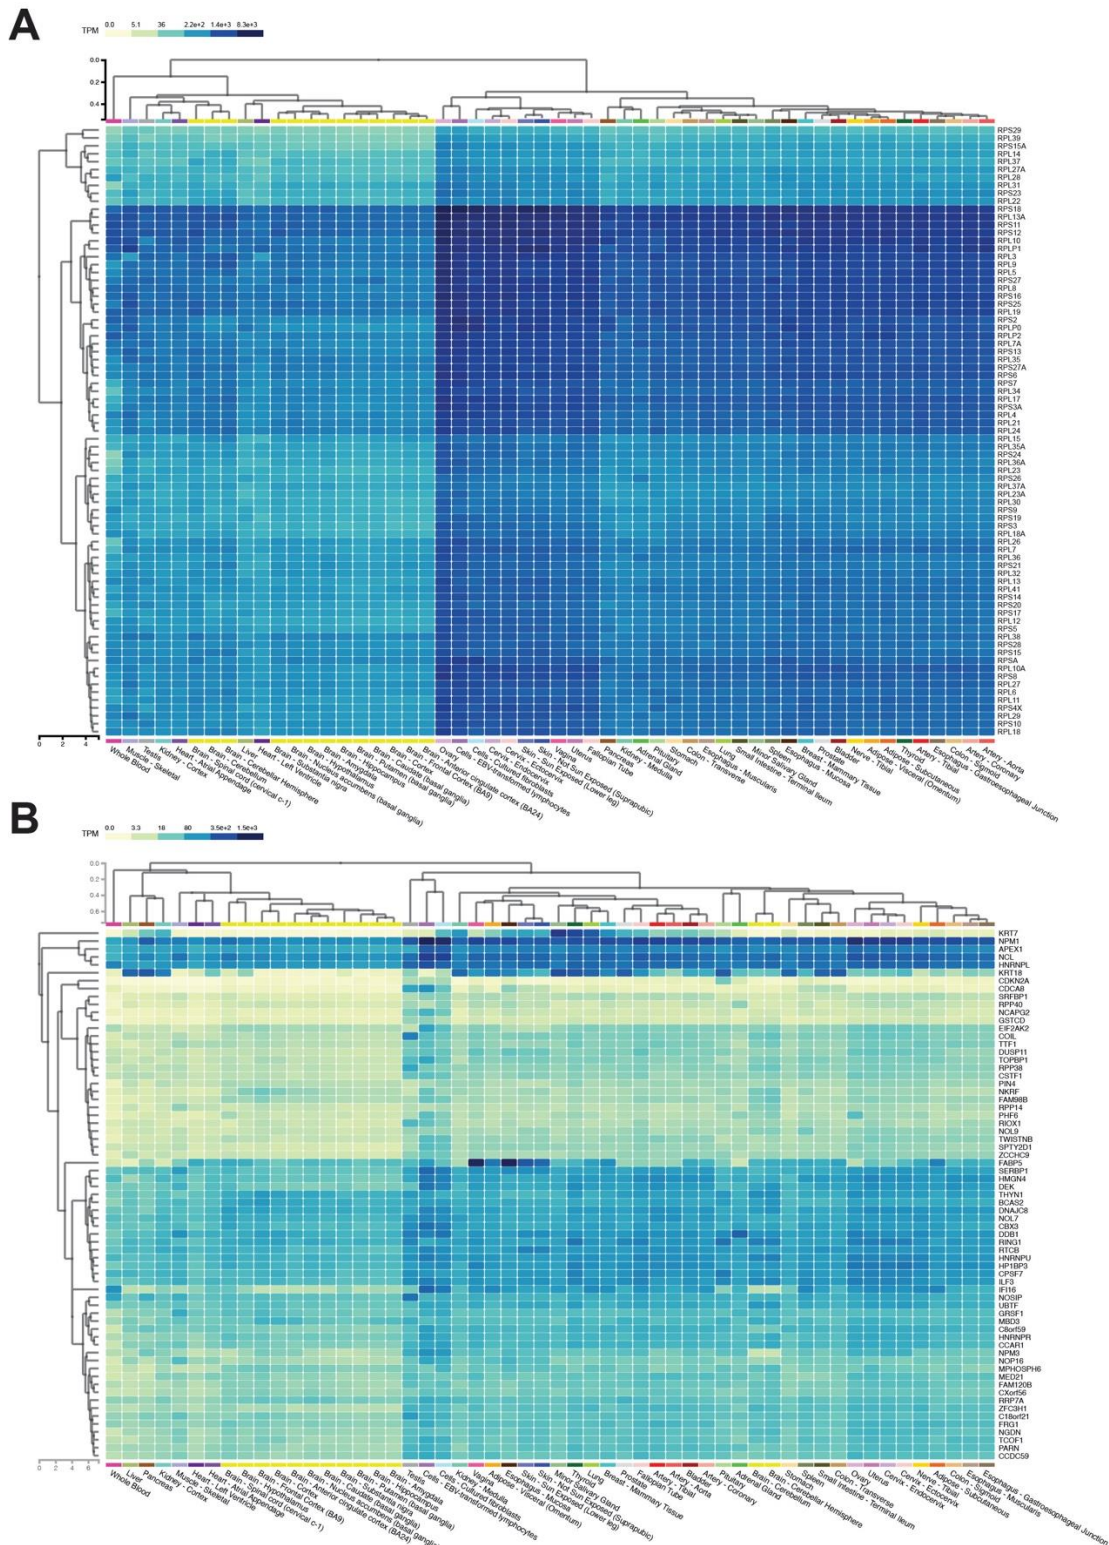

30 **Figure S3. GTex expression analysis of ribosome proteins and ribosome**  
 31 **assembly factors. (Related to Figure 1) (A) Heat map of mRNA expression levels of**  
 32 **all 80 human ribosomal proteins across the indicated tissues. (B) Heat map of mRNA**  
 33 **expression levels of ribosome biogenesis factors not found in yeast (Tafforeau *et al.*,**  
 34 **2013).**  
 35

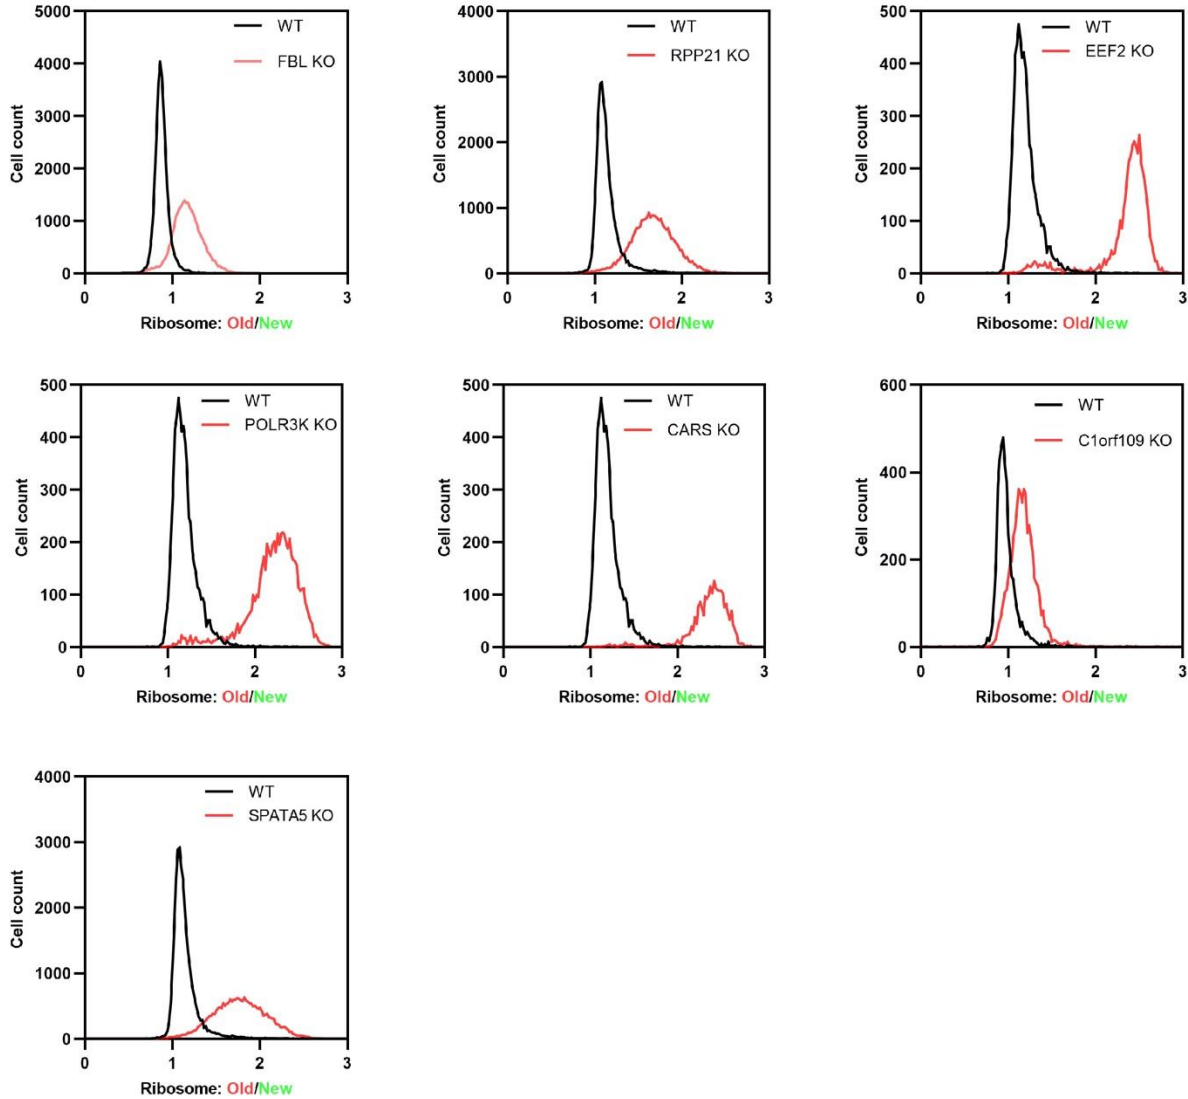

36

37

38

39

40

41

42

**Figure S4. Flow cytometry validation of genes identified in the primary screen.** (Related to Figure 2). Flow cytometry validation of HEK293T cells labeled for new and old ribosomes transduced with sgRNAs targeting the indicated gene (red) compared to control cells receiving an empty vector (black). (n>10,000 cells per condition). The ratio of old to new ribosomes is plotted on each x-axis.

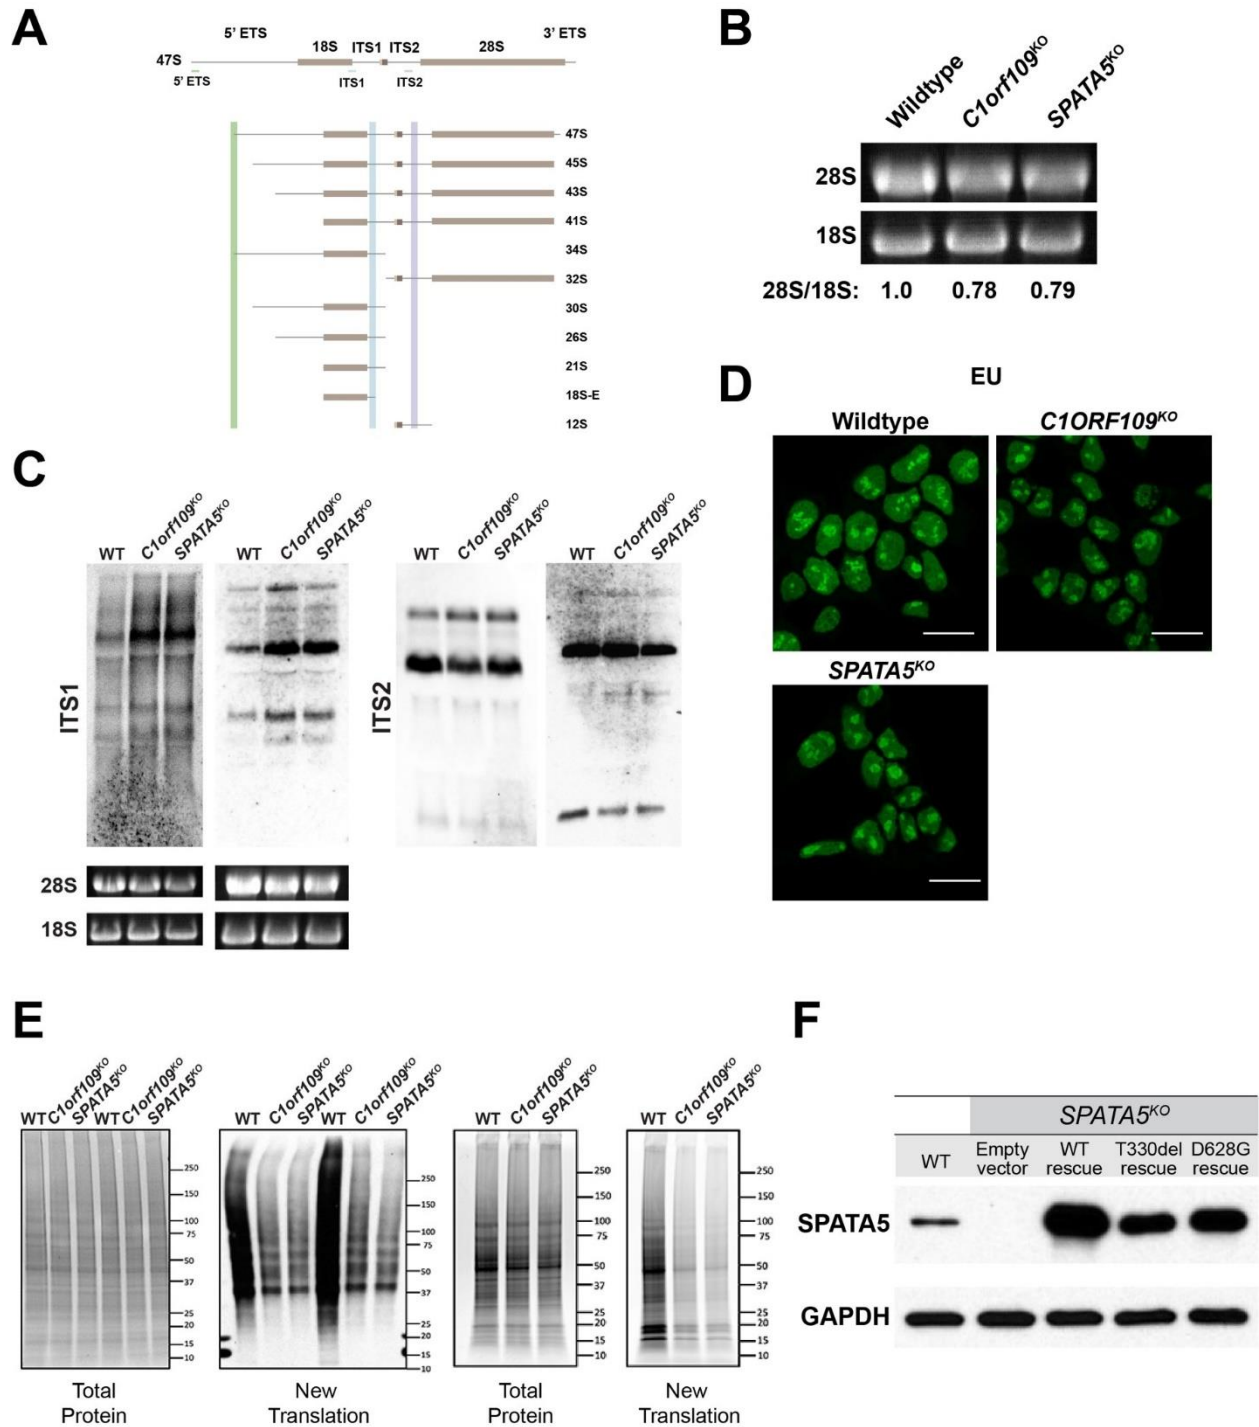

**Figure S5. Loss of *C1ORF109* and *SPATA5* disrupts ribosome maturation.**

(Related to Figure 3 and Figure 5). (A) Schematic of rRNA processing intermediates (based on (Tafforeau et al., 2013)) (B) Levels of mature 28S and 18S from wildtype, *C1ORF109*<sup>KO</sup> and *SPATA5*<sup>KO</sup> cells. Loading is the same for northern blots presented in Fig. 4. (C) Representative repeats of northern blots probed for ITS1 and ITS2. (D) Cells transduced with sgRNAs targeting *C1ORF109* and *SPATA5* pulse-labeled with EU (green). Loss of *C1ORF109* and *SPATA5* results in a reduction of EU labeling within nucleoli relative to control cells. Scale bars represent 20 μm. (E) Representative repeats

43  
44  
45  
46  
47  
48  
49  
50  
51  
52

53 of AHA pulse labeling experiments comparing new protein synthesis between control  
54 cells and *C1ORF109*<sup>KO</sup> and *SPATA5*<sup>KO</sup> cells. (E) Western blot analysis probed for  
55 SPATA5 and GAPDH showing the expression levels of endogenous SPATA5 compared  
56 to the expression of the three different SPATA5 transgenes.



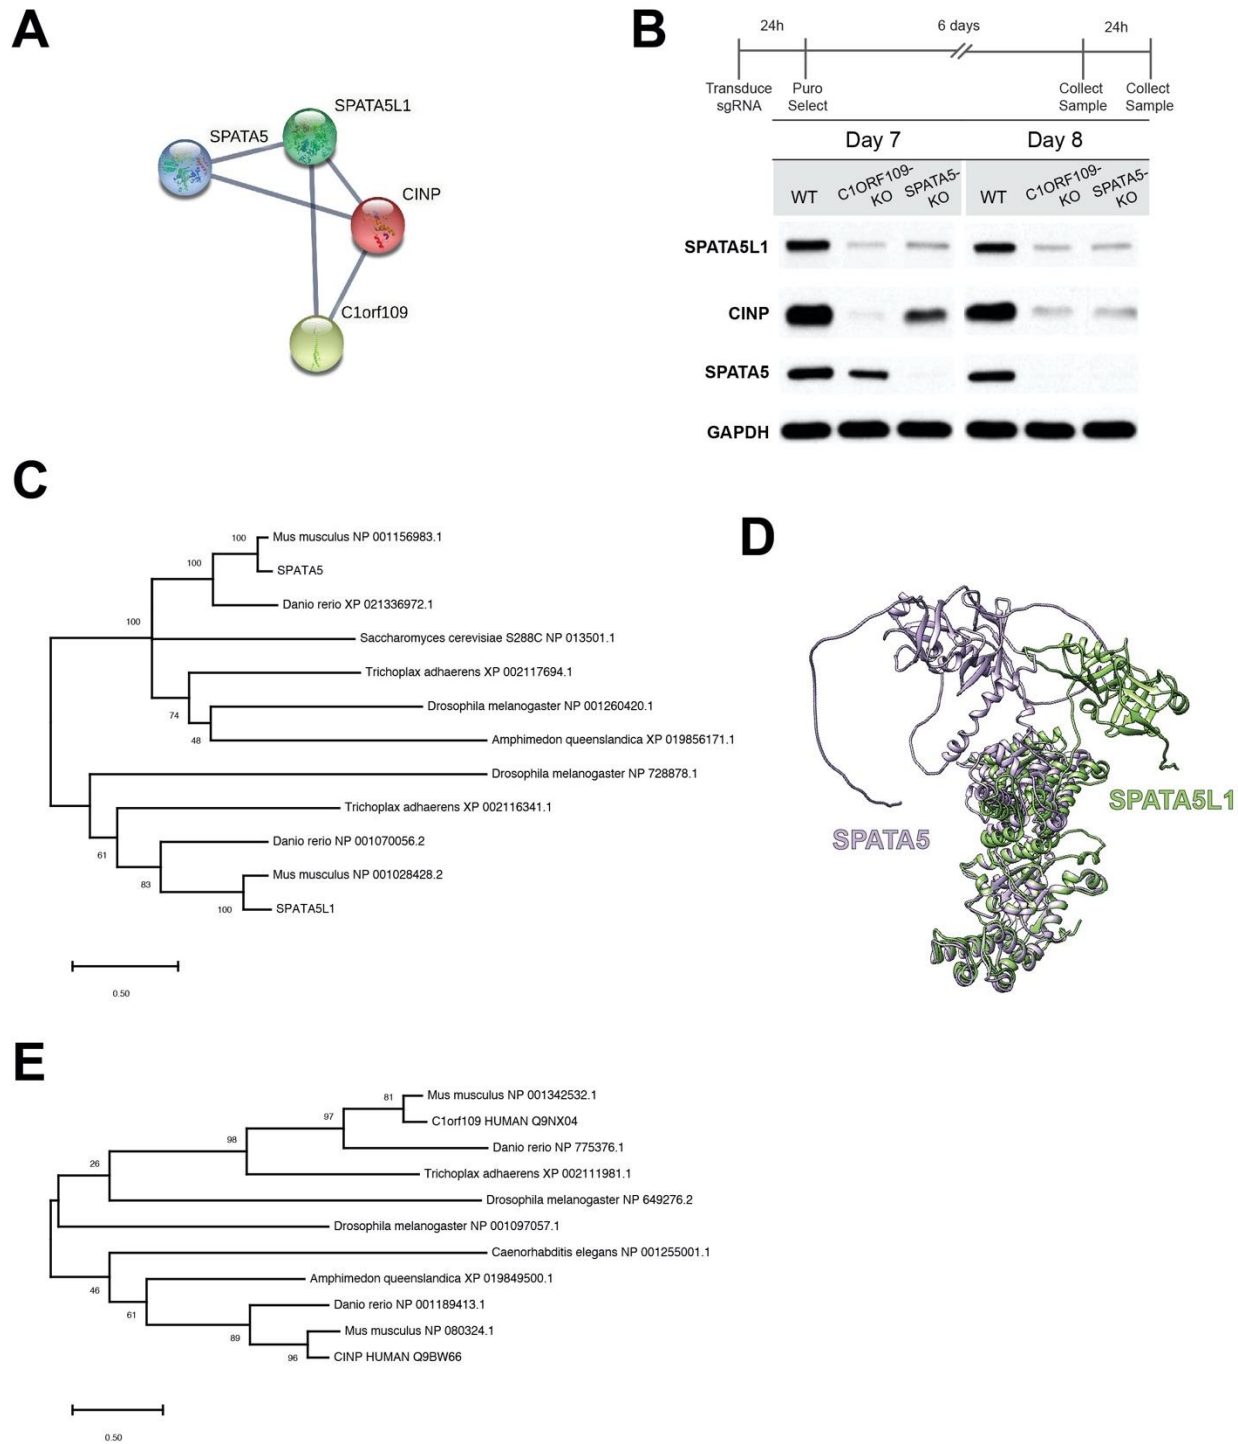

57  
 58 **Figure S6. SPATA5 and C1ORF109 interact with C1NP and SPATA5L1. (Related to**  
 59 **Figure 6).** (A) String analysis indicates that C1ORF109, SPATA5, SPATA5L1 and C1NP  
 60 likely associate with one another (Szklarczyk *et al.*, 2019). (B) Western blot reveals that  
 61 loss of *C1ORF109* or *SPATA5* results in decreased levels of SPATA5L1 and C1NP. (C)  
 62 Phylogenetic trees of selected SPATA5 and SPATA5L1 homologs. Maximum likelihood  
 63 phylogenetic analysis applied (MEGA X), branch support values shown (500 bootstrap  
 64 replicates). Branch lengths shown as the numbers of substitutions per site. NCBI  
 65 identifiers of sequences shown. (D) Matchmaker structural alignment of AlphaFold

66 predictions of SPATA5 and SPATA5L1. (E) Phylogenetic trees of C1ORF109 and CINP  
67 homologs. Details same as (C).

68

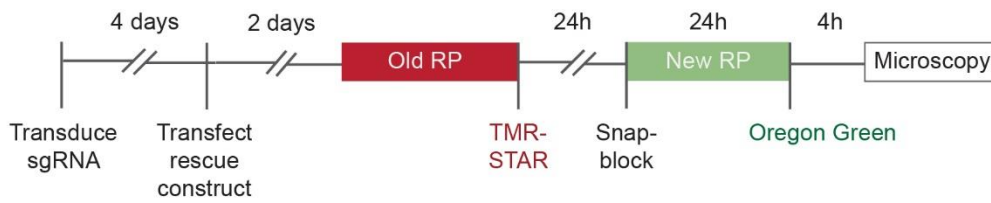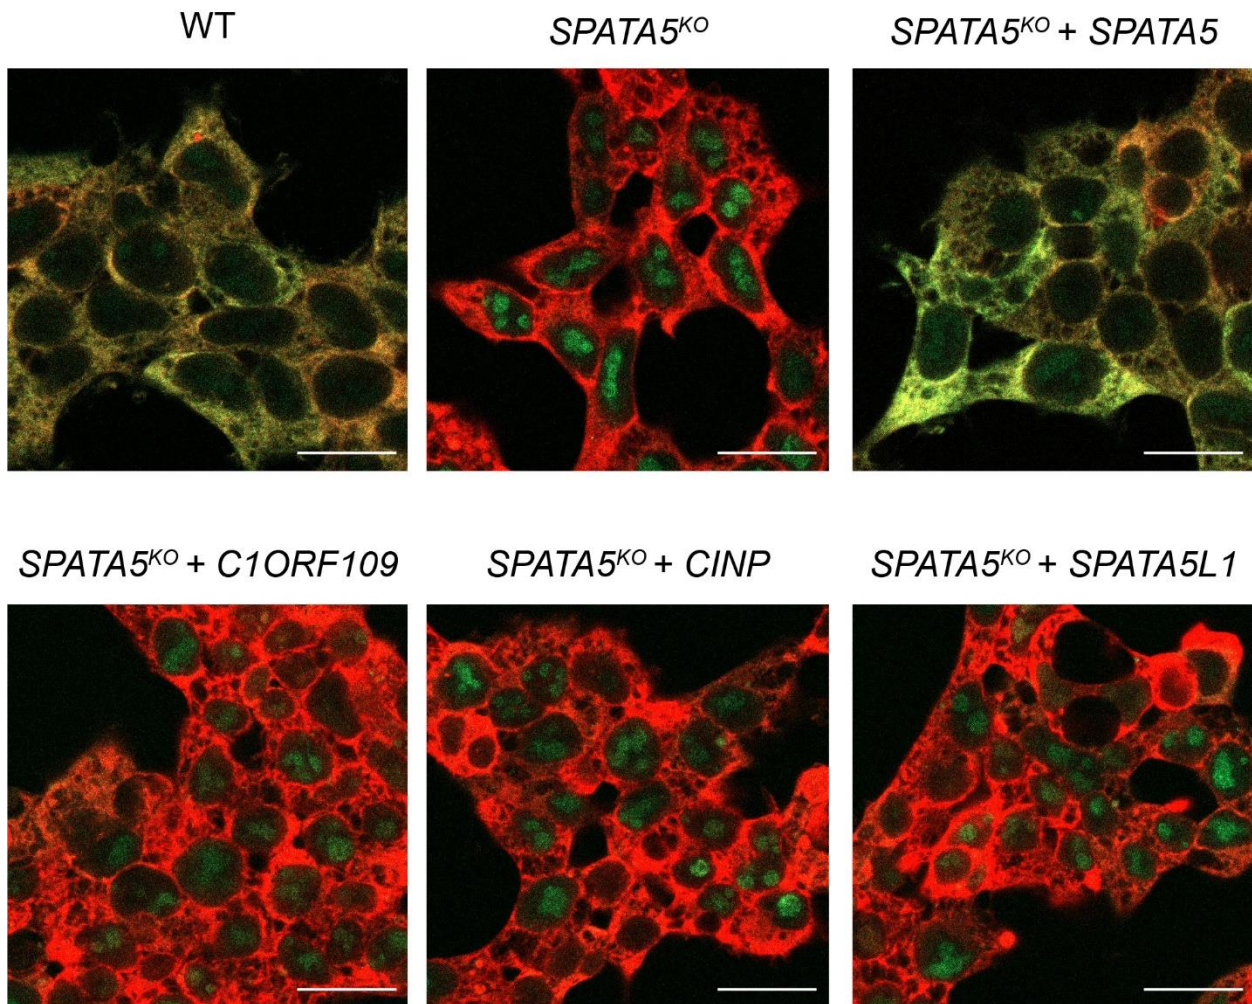

69

70

71

72

73

74

75

**Figure S7. *SPATA5L1*, *CINP*, and *C1ORF109* transgenes do not rescue the ribosome biogenesis defects on *SPATA5*<sup>KO</sup> cells. (Related to Figure 6).** (A) Control and *SPATA5*<sup>KO</sup> HEK293T cells transfected with wildtype *SPATA5*, *CINP*, *C1ORF109* and *SPATA5L1* rescue constructs stained for old and new ribosomes according to the schematic. Scale bars represent 20 μm.
