# Supplementary material for: Labeling of heterochronic ribosomes reveals C1ORF109 and SPATA5 control a late step in human ribosome assembly
Source: PubMed Central journal article supplement — Cell Rep. Author manuscript; Available in PMC 2022 Apr 12. (PMC9004343; doi:10.1016/j.celrep.2022.110597), 2022-03-29
Supplement: NIHMS1793837-supplement-4.pdf [file NIHMS1793837-supplement-4.pdf]

# MAGeCKFlute analysis for Chunyang's CRISPR KO screening data

by Jeon Lee on May 17, 2019

To run MAGeCKFlute pipeline, we need gene summary file generated by running MAGeCK RRA or MAGeCK MLE. MAGeCK MLE can be applied only when an experiment contains more than two conditions, for example, day0, drug treatment and DMSO treatment. So, only MAGeCK RRA results are explored here

## Import libraries and define customized functions

```
library(MAGeCKFlute)
library(knitr)
library(kableExtra)
library(ggplot2)
library(ggrepel)
library(carPools)
library(DESeq2)
library(edgeR)
library(pheatmap)
library(RColorBrewer)
library(gridExtra)
source("my_carpools.read.distribution.R")

setwd("Z:/BICF/BICF_Core/s167719/MichaelBuszczak/CRISPR_screen_ChunyangNi")

Sys.setenv(http_proxy="proxy.swmed.edu:3128")
Sys.setenv(https_proxy="proxy.swmed.edu:3128")

# define my_VolcanoView function
my_VolcanoView <- function(df, x = "logFC", y = "adj.P.Val", Label = NA, top = 5,
                           topnames = NULL, filename = NULL, x_cutoff = log2(1.5), y_cut
off = 0.05,
                           main = NULL, xlab = "Log2 Fold Change", ylab = "-Log10(Adjust
.P)", ...){
  requireNamespace("ggrepel", quietly=TRUE) || stop("need ggrepel package")
  gg = df[, c(x, y)]
  gg$group="no"
```

```

gg$group[gg[,x]>x_cutoff & gg[,y]<y_cutoff] = "up"
gg$group[gg[,x]< -x_cutoff & gg[,y]<y_cutoff] = "down"

gg[, y] = -log10(gg[, y])
if(!(top==0 & is.null(topnames))){
  gg$Label = rownames(gg)
  if(!is.na(Label)) gg$Label = df[, Label]
  gg = gg[order(abs(gg[,x]), gg[,y], decreasing = TRUE), ]
  idx1 = idx2 = c()
  if(top>0){
    idx1 = which(gg$group=="up")[1:min(top, sum(gg$group=="up"))]
    idx2 = which(gg$group=="down")[1:min(top, sum(gg$group=="down"))]
  }
  idx = unique(c(idx1, idx2, which(gg$Label %in% topnames)))
  gg$Label = as.character(gg$Label)
  gg$Label[setdiff(1:nrow(gg), idx)] = ""
  gg$Label = factor(gg$Label, levels = setdiff(unique(gg$Label), ""))
}
mycolour=c("no"="gray80", "up"="#e41a1c","down"="#377eb8")
#=====
p = ggplot(gg, aes(x=gg[,x], y=gg[,y], colour=group, fill=group))
p = p + geom_jitter(position = "jitter", show.legend = FALSE, alpha=0.8, size = 1
)
p = p + theme(text = element_text(colour="black",size = 14, family = "Helvetica")
,
      plot.title = element_text(hjust = 0.5, size=16),
      axis.text = element_text(colour="gray10"))
p = p + theme(axis.line = element_line(size=0.5, colour = "black"),
      panel.grid.major = element_blank(), panel.grid.minor = element_blan
k(),
      panel.border = element_blank(), panel.background = element_blank())
p = p + geom_hline(yintercept = -log10(y_cutoff), linetype = "dotted")
p = p + geom_vline(xintercept = c(-x_cutoff, x_cutoff), linetype = "dotted")
p = p + labs(x=xlab, y=ylob, title=main)

if(!(top==0 & is.null(topnames))){
  p = p + ggrepel::geom_text_repel(aes(x=gg[idx,x],y=gg[idx,y], label = Label), d
ata=gg[idx, ],
                                fontface = 'bold', size = 4,
                                box.padding = unit(0.4, "lines"), segment.colou
r = 'grey50',
                                point.padding = unit(0.3, "lines"), segment.si
ze = 0.3)
  p = p + scale_color_manual(values=mycolour)
  p = p + scale_fill_manual(values=mycolour)
  p = p + theme(legend.position = "none")
}

```

```

    return(p)
}

# define my_EnrichedGeneView
my_EnrichedGeneView=function(enrichment, geneList,
                              rank_by = "p.adjust",
                              top = 5, bottom = 5,
                              custom_pid = NULL,
                              keytype = "Symbol",
                              gene_cutoff = c(-log2(1.5), log2(1.5)),
                              custom_gene = NULL,
                              charLength = 40,
                              filename = NULL,
                              width = 7, height = 5, ...){

  if(is(enrichment, "enrichResult")) enrichment = enrichment@result
  if(is(enrichment, "gseaResult")) enrichment = enrichment@result

  ## No enriched pathways ##
  if(is.null(enrichment) || nrow(enrichment)==0){
    p1 = noEnrichPlot("No enriched terms")
    if(!is.null(filename)){
      ggsave(plot=p1,filename=filename, units = "in", width=width, height=height, ...
    )
    }
    return(p1)
  }

  ## Rank enriched pathways ##
  enrichment$logP = round(-log10(enrichment$p.adjust), 1)
  enrichment = enrichment[!is.na(enrichment$ID), ]
  if(tolower(rank_by) == "p.adjust"){
    enrichment = enrichment[order(enrichment$p.adjust), ]
  }else if(tolower(rank_by) == "nes"){
    enrichment = enrichment[order(abs(enrichment$NES), decreasing = TRUE), ]
  }

  ## Normalize term description ##
  terms = as.character(enrichment$Description)
  terms = lapply(terms, function(x,k){
    x = as.character(x)
    if(nchar(x)>k){x=substr(x,start=1,stop=k)}
    return(x)}, charLength)
  enrichment$Description = do.call(rbind, terms)
  enrichment = enrichment[!duplicated(enrichment$Description),]

```

```

## Select pathways to show ##
pid_neg <- pid_pos <- NULL
if(bottom>0){
  tmp = enrichment[enrichment$NES<0, ]
  pid_neg = tmp$ID[1:min(nrow(tmp), bottom)]
}
if(top>0){
  tmp = enrichment[enrichment$NES>0, ]
  pid_pos = tmp$ID[1:min(nrow(tmp), top)]
}
idx = enrichment$ID %in% c(custom_pid, pid_neg, pid_pos)
if(sum(idx)==0) stop("No input pathway found !!!")

## Prepare data for plotting ##
enrichment = enrichment[idx, ]
enrichment$Description = factor(enrichment$Description,
                                levels=enrichment$Description)
geneNames = strsplit(enrichment$geneName, "\\\/")
geneIds = strsplit(enrichment$geneID, "\\\/")
gg = data.frame(ID = rep(enrichment$ID, enrichment$Count),
                Term = rep(enrichment$Description, enrichment$Count),
                Size = rep(enrichment$logP, enrichment$Count),
                Gene = unlist(geneNames), geneIds = unlist(geneIds),
                stringsAsFactors = FALSE)

## Select genes to show ##
names(geneList) = toupper(names(geneList))
geneList = geneList[geneList<gene_cutoff[1] | geneList>gene_cutoff[2] |
                  names(geneList) %in% custom_gene]
if(keytype == "Symbol") gg$GeneScore = geneList[gg$Gene]
if(keytype == "Entrez") gg$GeneScore = geneList[gg$geneIds]

## Rank pathways and genes ##
gg = gg[!is.na(gg$GeneScore), ]
gg$Term = factor(gg$Term, levels = unique(gg$Term))
gg = gg[order(gg$GeneScore), ]
gg$Gene = factor(gg$Gene, levels = unique(gg$Gene))
# Plot the dot heatmap
p1 = ggplot(data=gg, aes(x=Gene, y=Term, size=Size, color = GeneScore))
p1 = p1 + geom_point()
p1 = p1 + scale_color_gradient2(low = "#081087", high = "#c12603")
p1 = p1 + theme(panel.grid.major=element_line(colour="gray90"),
                panel.grid.minor=element_blank(),
                panel.background=element_blank())
p1 = p1 + labs(x=NULL, y=NULL, color = "Gene score", size = "LogP")
# p1 = p1 + theme(legend.position="top")
# p1 = p1 + scale_size_continuous(guide = FALSE)

```

```

p1 = p1 + theme(legend.key = element_rect(fill = "transparent", colour = "transparent"))
p1 = p1 + theme(text = element_text(colour="black",size = 14, family = "Helvetica"))
,
    plot.title = element_text(hjust = 0.5, size=18),
    axis.text = element_text(colour="gray10"),
    axis.text.x = element_text(angle = 60, hjust = 1, vjust = 1))
p1 = p1 + theme(axis.line = element_line(size=0.5, colour = "black"),
    panel.grid.major = element_blank(), panel.grid.minor = element_blank(),
    panel.border = element_blank(), panel.background = element_blank(),
    legend.key = element_rect(fill = "transparent"))
}

```

## Section I: Quality control

### 1. Read mapping QC

MAGeCK Count in MAGeCK generates a count summary file, which summarizes some basic QC scores at raw count level, including map ratio, Gini index, and NegSelQC.

```

countsummary <- read.table("Run056.countsummary.txt", sep='\t', header=T)
kable(countsummary) %>% kable_styling() %>% scroll_box(width = "100%")

```

| File                                           | Label     | Reads    | Mapped   | Percentage |
|------------------------------------------------|-----------|----------|----------|------------|
| DATA/P4_A01_S1_cutadapt.fastq                  | P4_A01_S1 | 36210762 | 31762656 | 0.8772     |
| DATA/P5_A02_S2_cutadapt.fastq                  | P5_A02_S2 | 60985024 | 52932944 | 0.8680     |
| DATA/US_A03_S3_cutadapt.fastq                  | US_A03_S3 | 37562457 | 33009520 | 0.8788     |
| DATA/Brunello_L28snap_P1_A01_S1_cutadapt.fastq | P1_A01_S1 | 46658350 | 41274188 | 0.8846     |
| DATA/Brunello_L28snap_P1_A02_S2_cutadapt.fastq | P1_A02_S2 | 46827038 | 41332493 | 0.8827     |
| DATA/Brunello_L28snap_P1_A03_S3_cutadapt.fastq | P1_A03_S3 | 40935502 | 36296265 | 0.8867     |

MapRatesView(countsummary)

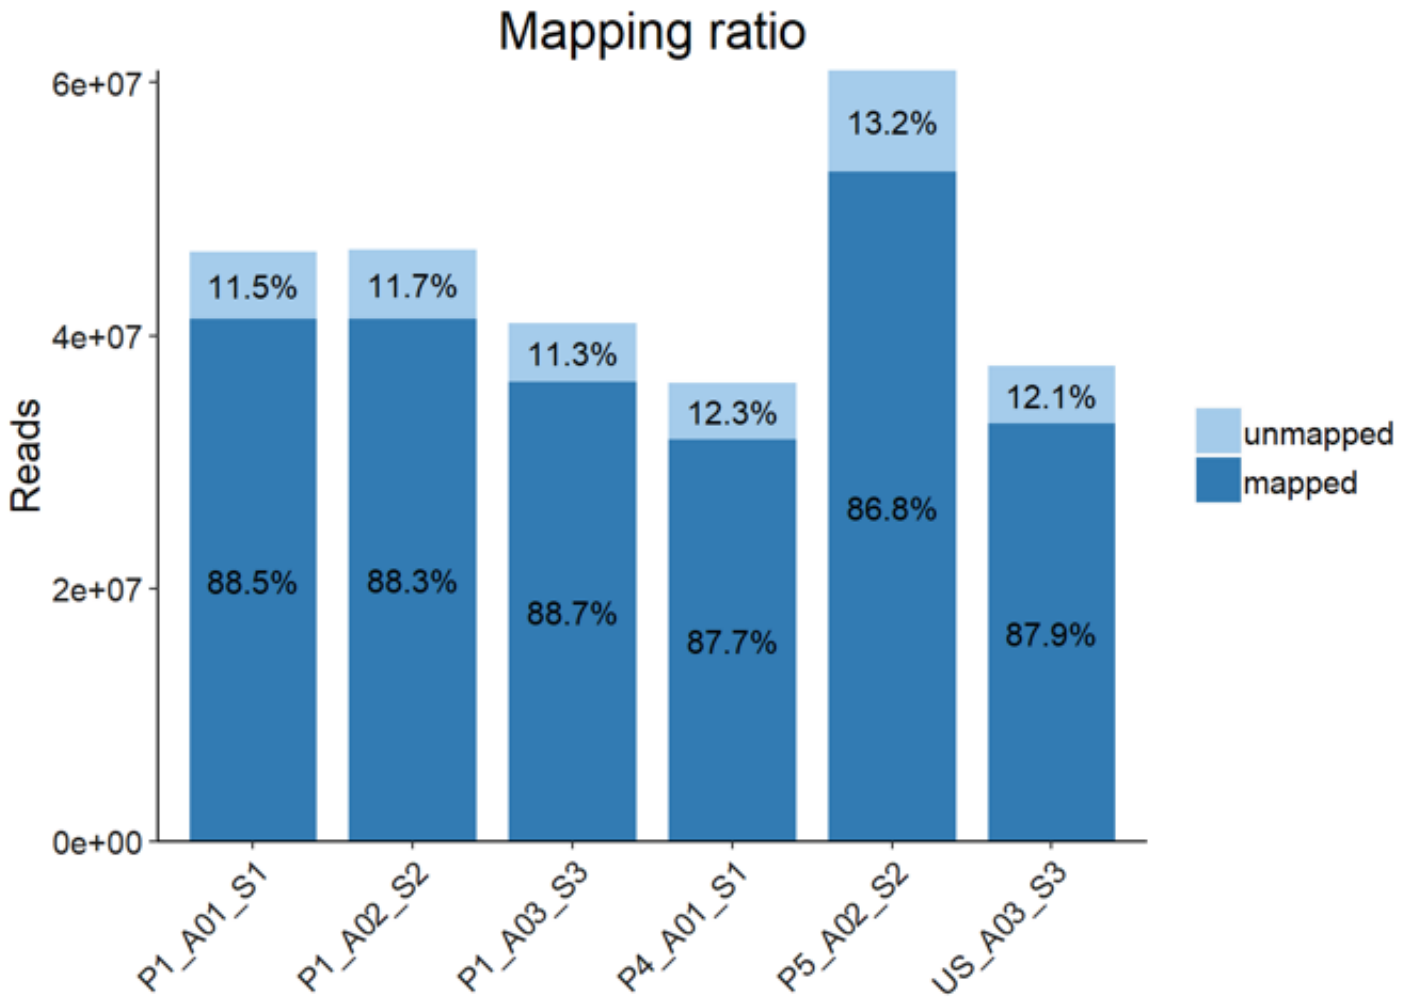

```
IdentBarView(countsummary, x = "Label", y = "GiniIndex",
             ylab = "Gini index", main = "Evenness of sgRNA reads")
```

## Evenness of sgRNA reads

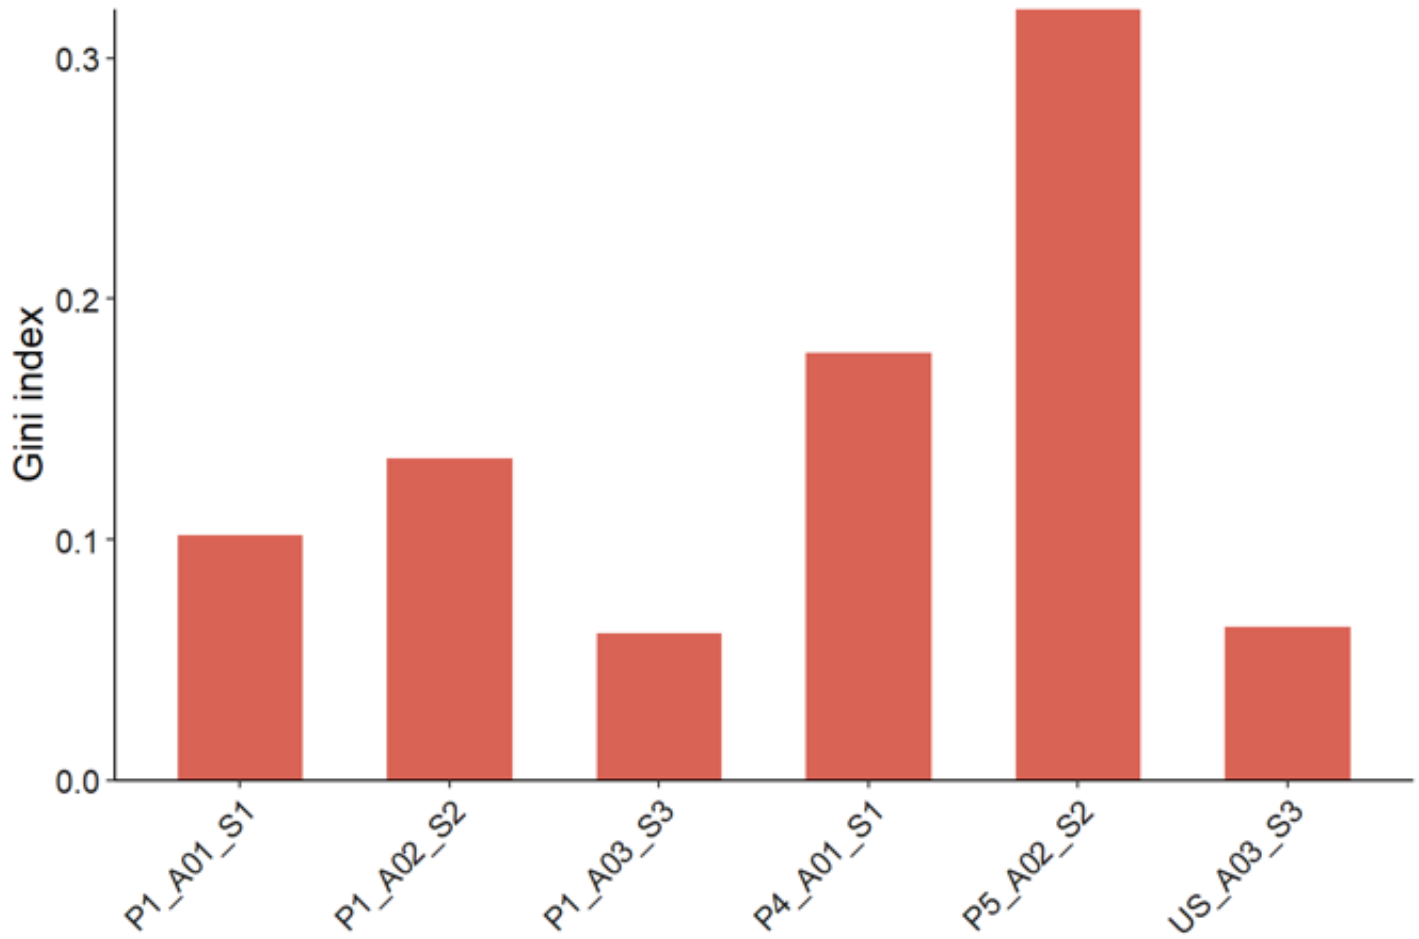

```
countsummary$Missed = log10(countsummary$Zerocounts)
IdentBarView(countsummary, x = "Label", y = "Missed", fill = "#394E80",
  ylab = "Log10 missed gRNAs", main = "Missed sgRNAs")
```

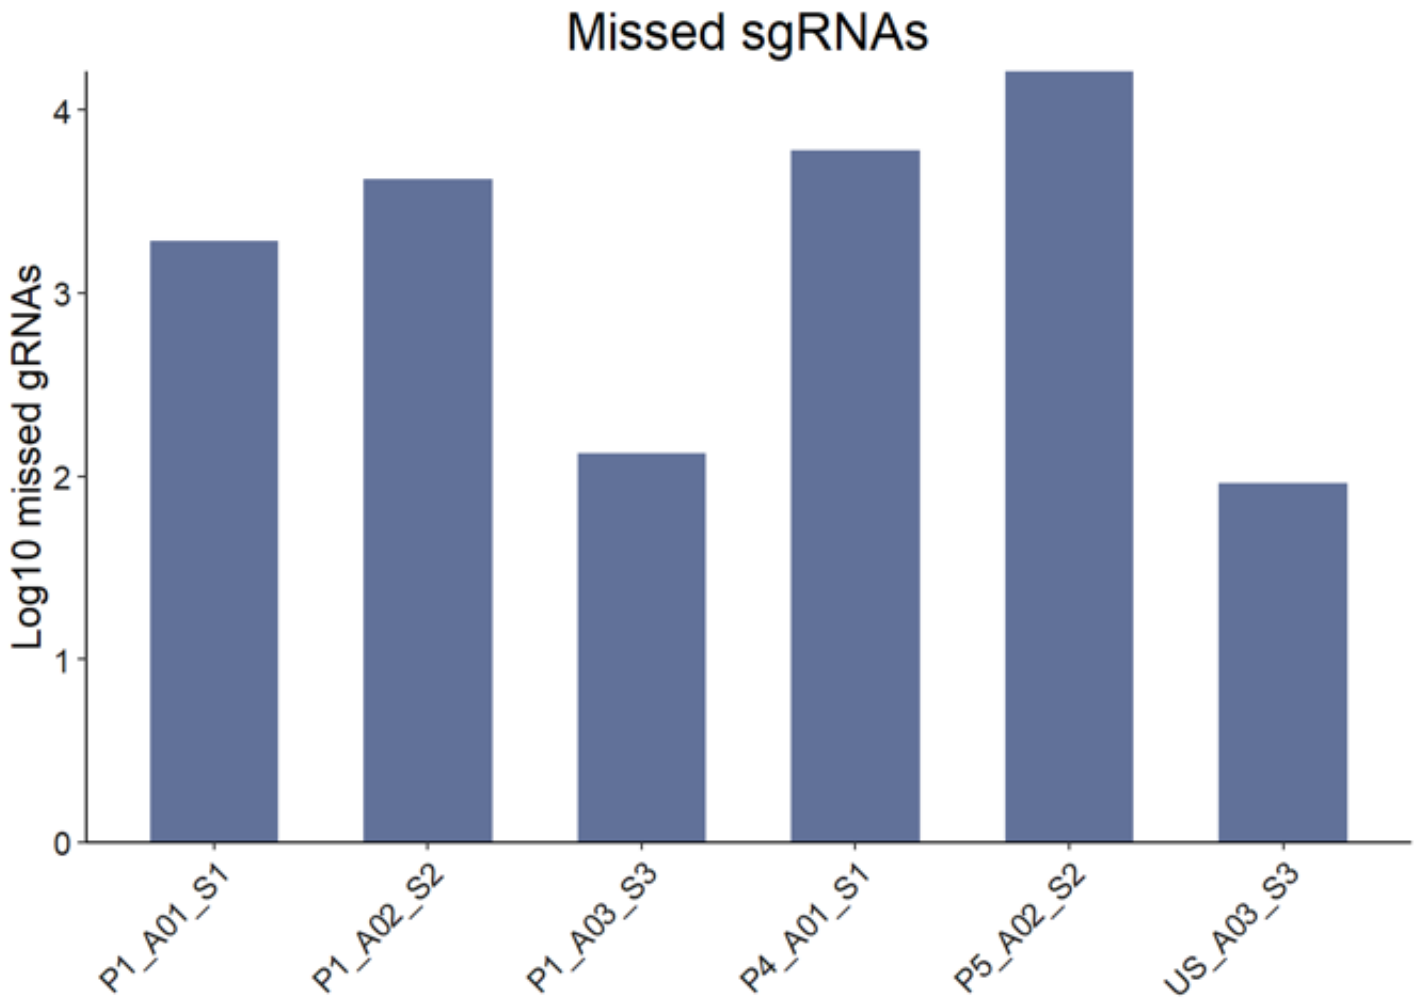

## 2. SampleQC

### 1) CRISPR library count summary

```

#== Read the count summary file
Count_summary <- read.table("Run056.countsummary.txt", sep='\t', header=T)
kable(Count_summary) %>% kable_styling() %>% scroll_box(width = "100%")

```

| File                          | Label     | Reads    | Mapped   | Percentage |
|-------------------------------|-----------|----------|----------|------------|
| DATA/P4_A01_S1_cutadapt.fastq | P4_A01_S1 | 36210762 | 31762656 | 0.8772     |
| DATA/P5_A02_S2_cutadapt.fastq | P5_A02_S2 | 60985024 | 52932944 | 0.8680     |
| DATA/US_A03_S3_cutadapt.fastq | US_A03_S3 | 37562457 | 33009520 | 0.8788     |



|                                                |           |          |          |        |
|------------------------------------------------|-----------|----------|----------|--------|
| DATA/Brunello_L28snap_P1_A01_S1_cutadapt.fastq | P1_A01_S1 | 46658350 | 41274188 | 0.8846 |
| DATA/Brunello_L28snap_P1_A02_S2_cutadapt.fastq | P1_A02_S2 | 46827038 | 41332493 | 0.8827 |
| DATA/Brunello_L28snap_P1_A03_S3_cutadapt.fastq | P1_A03_S3 | 40935502 | 36296265 | 0.8867 |

## 2) sgRNA count statistics

```

#== Read the sgRNA count table
my_data <- read.table("Run056.count.txt", sep='\t', header=T)
sgRNA_table <- my_data[,c(3:8)]
rownames(sgRNA_table) <- my_data$sgRNA

# sgRNA count statistics
Mean <- apply(sgRNA_table, 2, mean)
Median <- apply(sgRNA_table, 2, median)
SD <- apply(sgRNA_table, 2, sd)
Min <- apply(sgRNA_table, 2, min)
Max <- apply(sgRNA_table, 2, max)

sgRNACount_stat <- data.frame(Mean, Median, SD, Min, Max)
kable(sgRNACount_stat) %>% kable_styling()

```

|           | Mean     | Median | SD       | Min | Max   |
|-----------|----------|--------|----------|-----|-------|
| P4_A01_S1 | 410.1530 | 323    | 370.0146 | 0   | 7217  |
| P5_A02_S2 | 683.5261 | 481    | 795.9970 | 0   | 26819 |
| US_A03_S3 | 426.2538 | 367    | 251.4700 | 0   | 3863  |
| P1_A01_S1 | 532.9759 | 441    | 416.0654 | 0   | 6236  |
| P1_A02_S2 | 533.7288 | 433    | 456.0498 | 0   | 20131 |
| P1_A03_S3 | 468.6957 | 405    | 271.1725 | 0   | 2361  |

## 3) log<sub>2</sub>(sgRNA count) histogram

```
# log2 sgRNA count histogram
for (i in c(3:8)) {
  my_carpools.read.distribution(my_data, namecolumn=1, fullmatchcolumn=i, breaks=200,
                               title=names(my_data)[i], xlab="log2 Readcount", ylab="#
sgRNAs", statistics=TRUE)
}
```

### P4\_A01\_S1

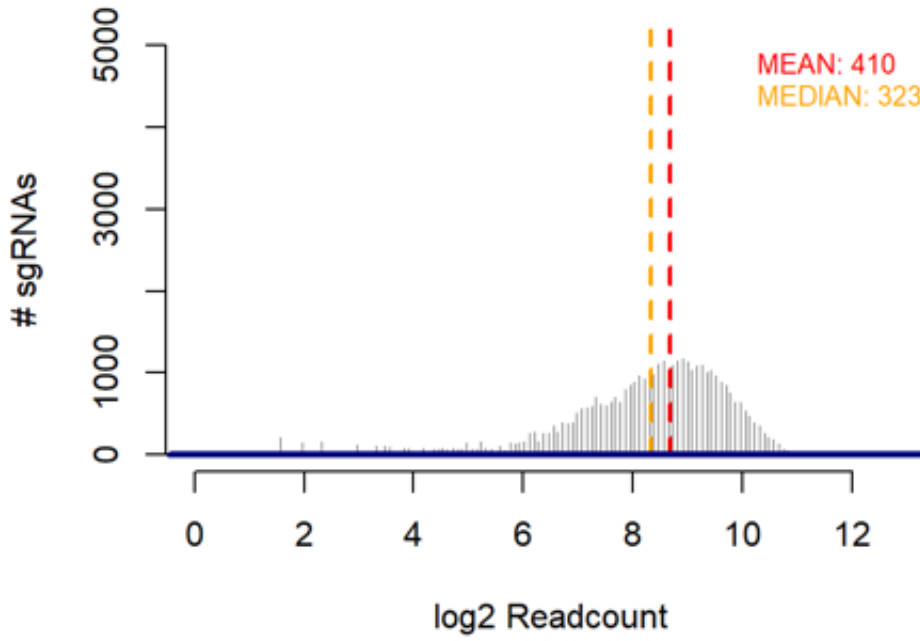

### P5\_A02\_S2

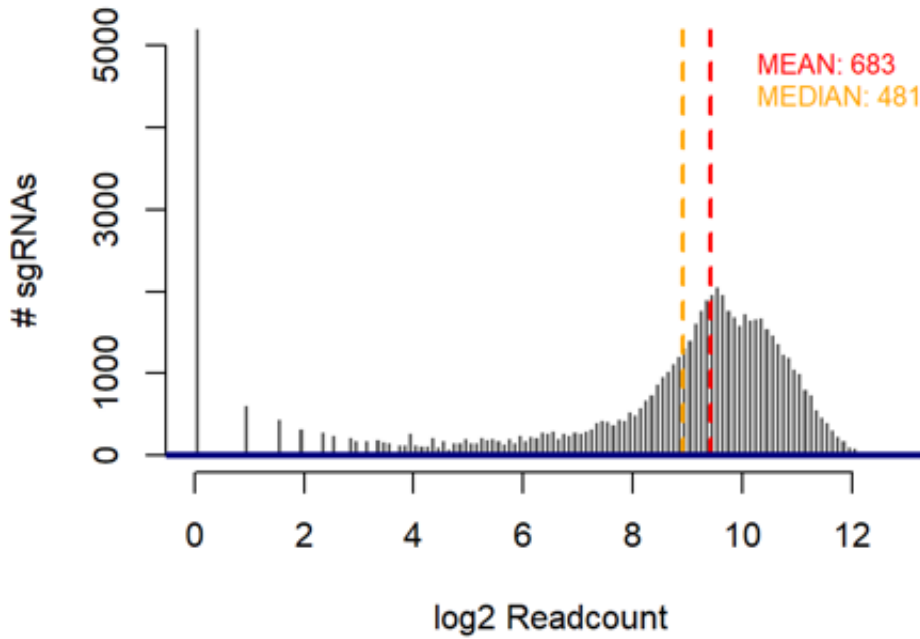

### US\_A03\_S3

100

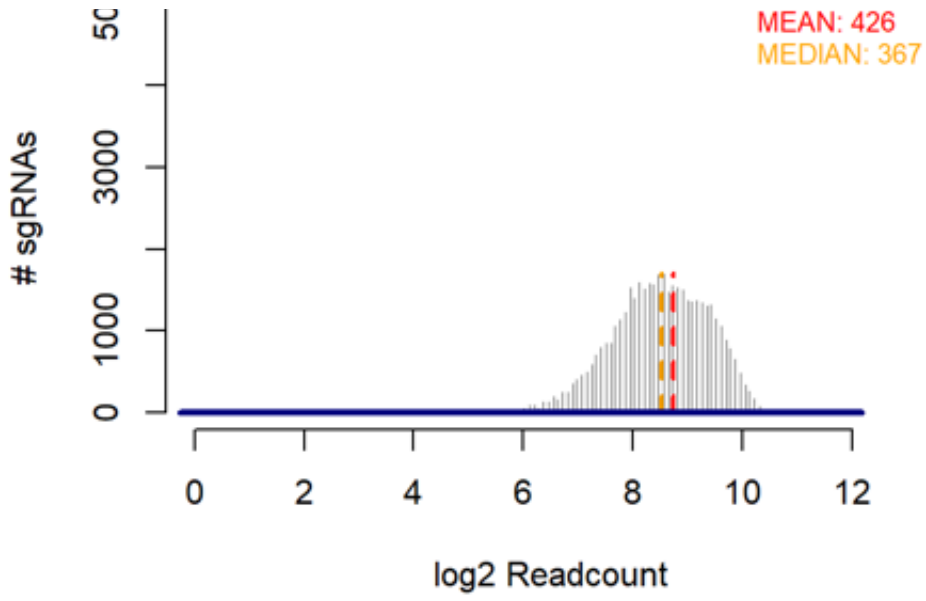

### P1\_A01\_S1

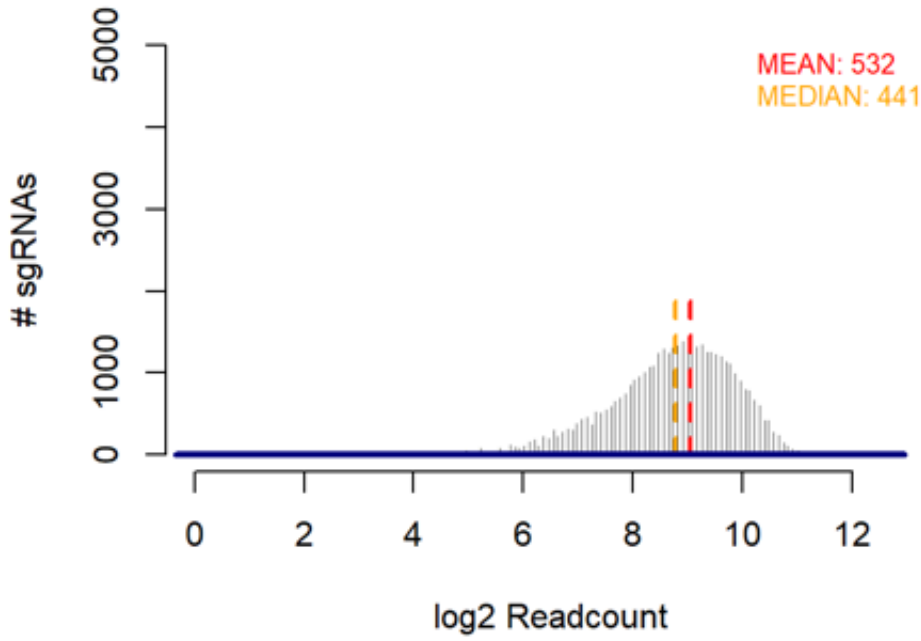

### P1\_A02\_S2

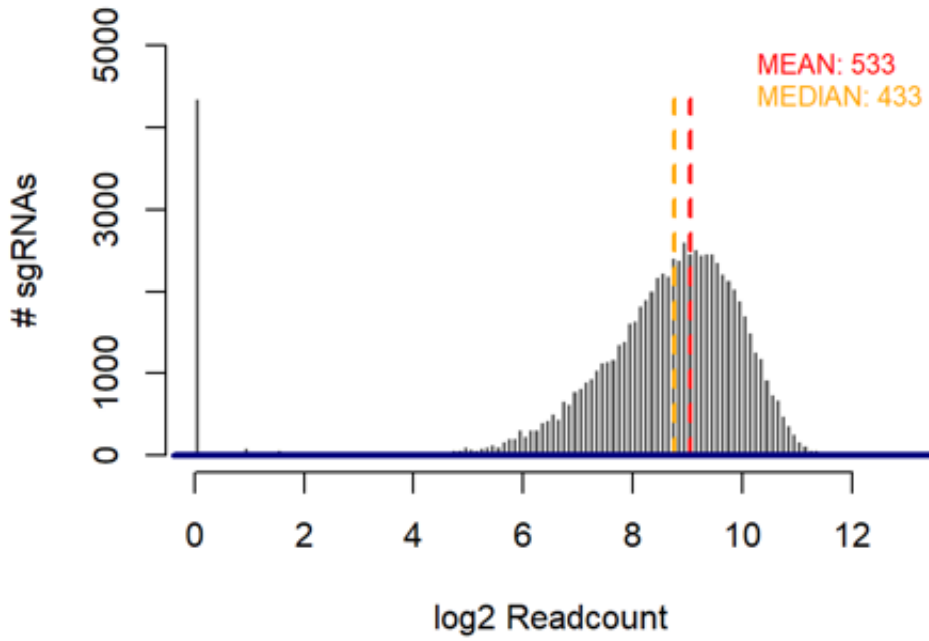

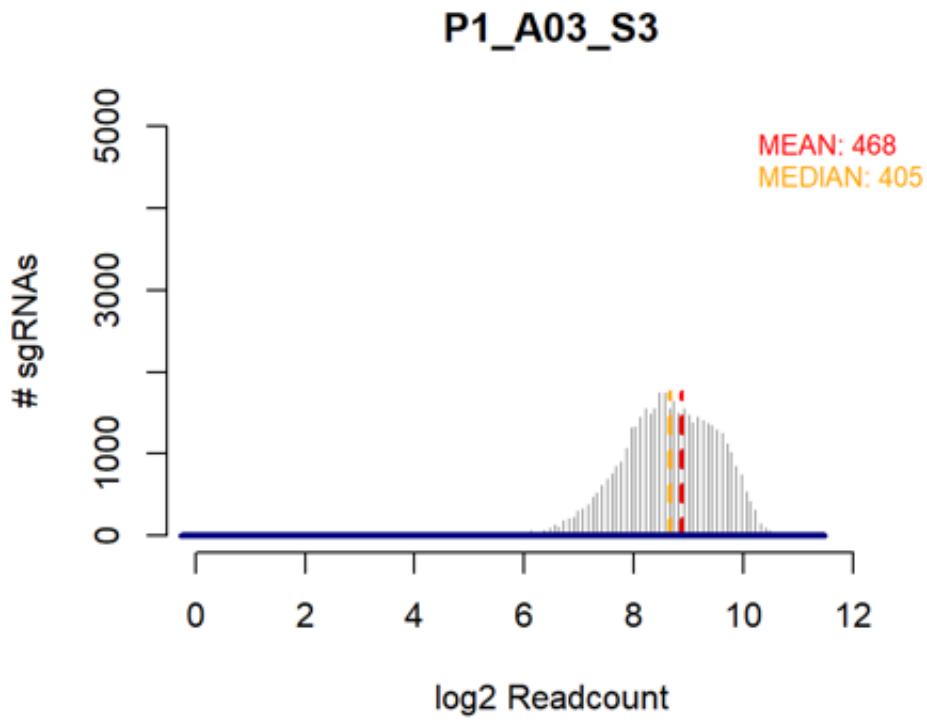

#### 4) Gene count statistics

```

#== Generate a gene count table
idx_NonTargeting <- grep("^Non-Targeting", my_data$Gene)
my_data <- my_data[-c(idx_NonTargeting),]
gene_table <- aggregate(. ~Gene, data=my_data, FUN=sum)

# Correct wrong gene names.
# Note that gene names starting with a numeric value were ordered first
full_gene_list <- gene_table$Gene
idx <- grep("[0-9]", full_gene_list)
wrong_names <- as.character(full_gene_list[idx])
tmp <- strsplit(wrong_names, "-")
correct_names <- vector(mode="character", length=length(idx))

for (i in idx) {
  if (tmp[[i]][2]=="Dec") {
    correct_names[i] <- paste("DEC", tmp[[i]][1], sep="")
  }
  if (tmp[[i]][2]=="Mar") {
    correct_names[i] <- paste("MARCH", tmp[[i]][1], sep="")
  }
  if (tmp[[i]][2]=="Sep") {
    correct_names[i] <- paste("SEPT", tmp[[i]][1], sep="")
  }
}
#
gene_table <- gene_table[,3:8]
rownames(gene_table) <- full_gene_list
rownames(gene_table)[1:length(idx)] <- correct_names

# Gene count statistics
Mean <- apply(gene_table, 2, mean)
Median <- apply(gene_table, 2, median)
SD <- apply(gene_table, 2, sd)
Min <- apply(gene_table, 2, min)
Max <- apply(gene_table, 2, max)

geneCount_stat <- data.frame(Mean, Median, SD, Min, Max)
kable(geneCount_stat) %>% kable_styling()

```

|           | Mean     | Median | SD        | Min | Max   |
|-----------|----------|--------|-----------|-----|-------|
| P4_A01_S1 | 1619.397 | 1463.0 | 876.6324  | 0   | 12842 |
| P5_A02_S2 | 2695.492 | 2412.5 | 1774.1094 | 0   | 40650 |

|           |          |        |           |     |       |
|-----------|----------|--------|-----------|-----|-------|
| US_A03_S3 | 1681.005 | 1544.0 | 701.3298  | 107 | 5156  |
| P1_A01_S1 | 2107.170 | 1907.0 | 1044.1605 | 26  | 16522 |
| P1_A02_S2 | 2107.465 | 1909.0 | 1112.6047 | 1   | 32253 |
| P1_A03_S3 | 1851.022 | 1698.0 | 751.4913  | 255 | 5223  |

## 5) Sample heatmap and PCA plot

```

#=== DESeq analysis
countData <- gene_table
SampleID <- gsub("(Brunello_L28snap_)(.*)", "\\2", colnames(countData))
colnames(countData) <- SampleID

colData <- data.frame(Group=c("A01", "A02", "A03", "A01", "A02", "A03"),
                      Batch=c("MB-sfVKAH", "MB-sfVKAH", "MB-sfVKAH", "MBCN-gbgnZ8", "MBCN-
-gbgnZ8", "MBCN-gbgnZ8"))
rownames(colData) <- SampleID

# Data normalization
dds <- DESeqDataSetFromMatrix(countData = countData, colData = colData, design= ~ Gro
up + Batch)
vsd <- vst(dds, blind=FALSE)

##=Plot a heatmap using sample distances
#Euclidean distance
sampleDist_Euc <- dist(t(assay(vsd))) #distance matrix (lower trianglular matrix)
sampleDist_Euc_full <- as.matrix(sampleDist_Euc) #full matrix
colors <- colorRampPalette( rev(brewer.pal(9, "Blues")) )(255)
#pheatmap(sampleDistMatrix, clustering_distance_rows=sampleDists, clustering_distance
_cols=sampleDists, col=colors)
pheatmap(sampleDist_Euc_full, clustering_distance_rows=sampleDist_Euc, clustering_dis
tance_cols=sampleDist_Euc,
          annotation_row=colData[,c(1,2)], col=colors)

```



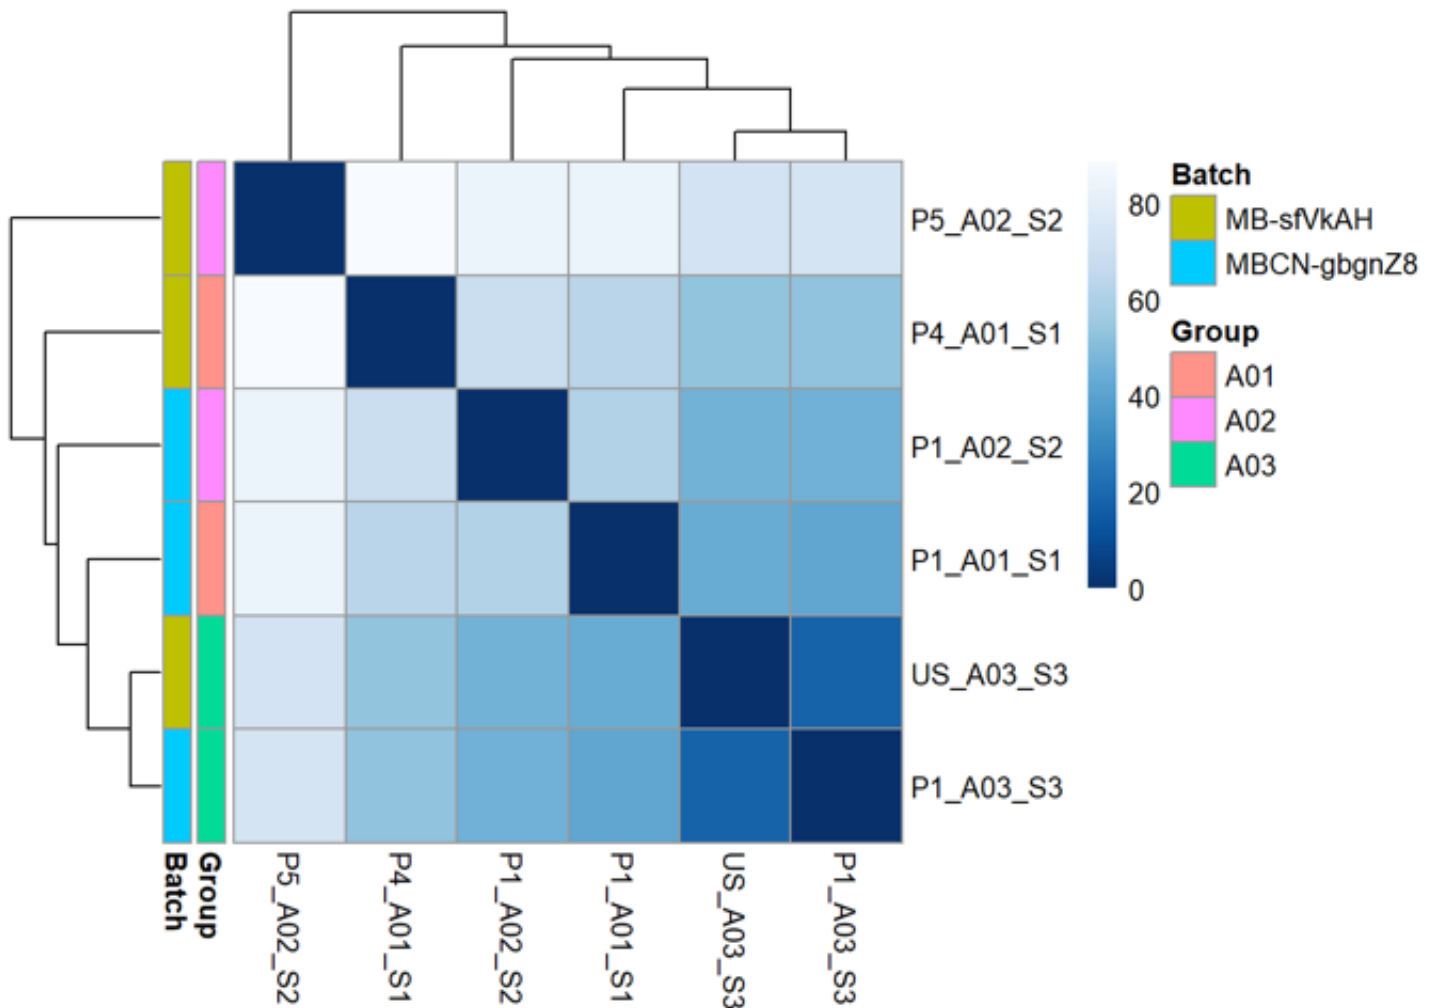

```
##Correlation distance
#sampleDist_Corr <- as.dist(1-cor(assay(vsd)))
#sampleDist_Corr_full <- as.matrix(sampleDist_Corr)
#
#pheatmap(sampleDist_Corr_full, clustering_distance_rows=sampleDist_Corr, clustering_
distance_cols=sampleDist_Corr,
#         annotation_row=colData[,c(1,2)], col=colors)

##=Plot a PCA plot
pcaData <- plotPCA(vsd, intgroup=c("Group", "Batch"), returnData=TRUE)
#pcaData
percentVar <- round(100 * attr(pcaData, "percentVar"))
ggplot(pcaData, aes(PC1, PC2, color=Group, shape=Batch, label=rownames(colData))) +
geom_point(size=3) +
  geom_text_repel(force=10, color="black") +
  xlab(paste0("PC1: ", percentVar[1], "% variance")) +
  ylab(paste0("PC2: ", percentVar[2], "% variance"))
```

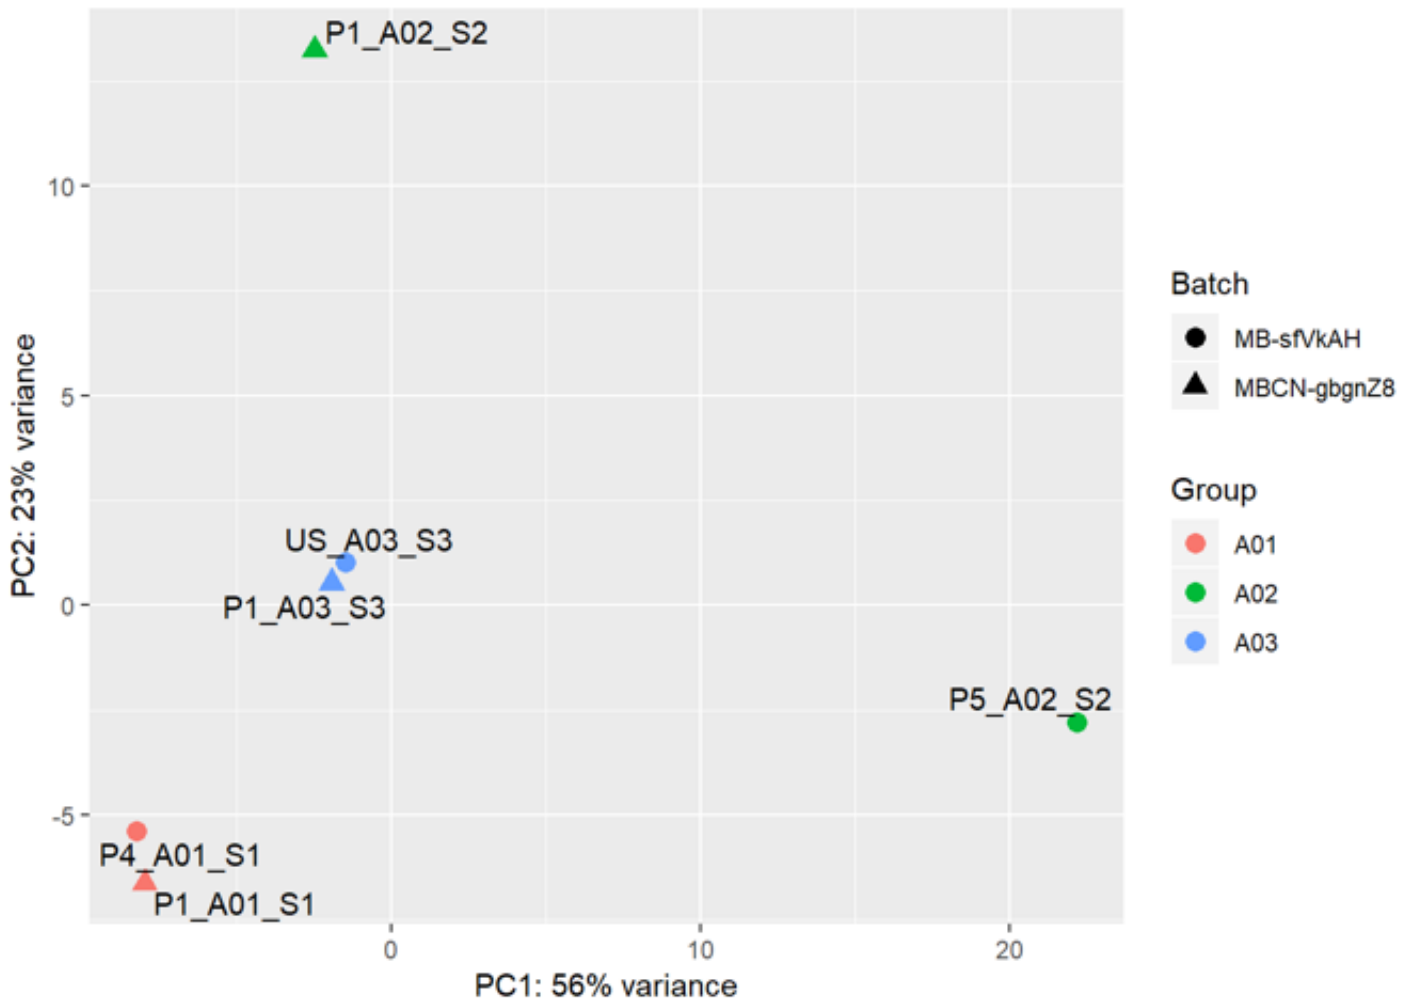

On the PCA plot, P1\_A01 and its replicate(P4-A01) samples cluster tightly and it's true to P1\_A03 and its replicate(US\_A03). So, we can confidently perform a group comparison between A01 vs. A03. However, for P1\_A02 and P5\_A02, considering the wide variation observed, it's not sure if we can take them as replicates for a group comparison—P5\_A02 presumably seems to be an outlier. For this reason, in general, an ideal CRISPR screening experiment requires triplicates for each condition.

## Section II: Downstream analysis of MAGeCK RRA

For experiments with two experimental conditions, MAGeCK-RRA is used to identify essential genes from CRISPR/Cas9 knockout screens. It tests the statistical significance of each observed change between two states. Gene summary file in MAGeCK-RRA results summarizes the statistical significance of positive

selection and negative selection. In this experiment, we are interested in the positive selection only so that positive selection results are explored accordingly.

# 1. A01\_vs\_A03 comparison

## 1) Load gene and sgrna summary data in MAGeCK RRA results

```
rra.gene_summary = read.table("Run056_A01vsA03.gene_summary.txt", sep='\t', header=TRUE)
kable(head(rra.gene_summary)) %>% kable_styling() %>% scroll_box(width = "100%")
```

| id       | num | neg.score | neg.p.value | neg.fdr  | neg.rank | neg.goodsgrna | neg.lfc | pos.score |
|----------|-----|-----------|-------------|----------|----------|---------------|---------|-----------|
| CLCN5    | 4   | 2.80e-06  | 0.0000106   | 0.212871 | 1        | 4             | -3.7046 | 1.000     |
| C19orf40 | 4   | 7.40e-06  | 0.0000318   | 0.319307 | 2        | 3             | -1.7679 | 0.774     |
| NLGN4Y   | 4   | 1.84e-05  | 0.0000820   | 0.549505 | 3        | 3             | -2.7906 | 0.482     |
| ZNF222   | 4   | 2.58e-05  | 0.0001145   | 0.575495 | 4        | 3             | -4.8987 | 0.718     |
| LIMA1    | 4   | 4.40e-05  | 0.0001799   | 0.622937 | 5        | 4             | -3.3333 | 0.999     |
| FAM19A2  | 4   | 4.59e-05  | 0.0001858   | 0.622937 | 6        | 3             | -4.8461 | 0.164     |

```
rra.sgrna_summary = read.table("Run056_A01vsA03.sgrna_summary.txt", sep='\t', header = TRUE)
kable(head(rra.sgrna_summary)) %>% kable_styling() %>% scroll_box(width = "100%")
```

| sgRNA          | Gene  | control_count | treatment_count | control_mean | treat_mean | LFC    |
|----------------|-------|---------------|-----------------|--------------|------------|--------|
| sgRNA_ID_23292 | ZPR1  | 210.84/329.28 | 5570.1/5195.1   | 263.49       | 5379.3     | 4.3464 |
| sgRNA_ID_50299 | RPP21 | 95.121/357.84 | 3088.6/3957.1   | 184.52       | 3496.0     | 4.2365 |
| sgRNA_ID_12207 | NARS  | 96.102/241.83 | 2305.1/2971     | 152.46       | 2616.9     | 4.0925 |
| sgRNA_ID_02325 | CARS  | 178.47/328.39 | 1780.7/5162.1   | 242.10       | 3031.9     | 3.6411 |
| sgRNA_ID_23290 | ZPR1  | 759.99/866.49 | 5744/5180.7     | 811.49       | 5455.1     | 2.7474 |

```
sgRNA_ID_50301 RPP21 251.04/614.84 3208.6/3194.9 392.88 3201.8 3.0235
```

## 2) Top-10 genes and sgRNAs for positive selection

```
dd.rra = ReadRRA(rra.gene_summary, organism = "hsa")
dd.rra <- dd.rra[order(-dd.rra$LFC),]
kable(head(dd.rra, 10)) %>% kable_styling(full_width = F)
```

|       | Official | EntrezID | LFC    | FDR      |
|-------|----------|----------|--------|----------|
| 8882  | ZPR1     | 8882     | 2.7150 | 0.001650 |
| 1938  | EEF2     | 1938     | 2.4784 | 0.004950 |
| 833   | CARS     | 833      | 2.4593 | 0.001650 |
| 7407  | VARS     | 7407     | 2.3906 | 0.033130 |
| 51728 | POLR3K   | 51728    | 1.9280 | 0.015752 |
| 54955 | C1orf109 | 54955    | 1.8334 | 0.014851 |
| 5687  | PSMA6    | 5687     | 1.7632 | 0.886904 |
| 1937  | EEF1G    | 1937     | 1.7062 | 0.009194 |
| 4677  | NARS     | 4677     | 1.6988 | 0.049196 |
| 1915  | EEF1A1   | 1915     | 1.6909 | 0.095002 |

```
dd.sgrna = ReadsgRRA(rra.sgrna_summary)
dd.sgrna <- dd.sgrna[order(-dd.sgrna$LFC),]
kable(head(dd.sgrna,10)) %>% kable_styling(full_width = F)
```

|   | sgrna          | Gene  | LFC    | FDR |
|---|----------------|-------|--------|-----|
| 1 | sgRNA_ID_23292 | ZPR1  | 4.3464 | 0   |
| 2 | sgRNA_ID_50299 | RPP21 | 4.2365 | 0   |

|     |                |        |        |   |
|-----|----------------|--------|--------|---|
| 3   | sgRNA_ID_12207 | NARS   | 4.0925 | 0 |
| 51  | sgRNA_ID_38611 | POP5   | 4.0450 | 0 |
| 25  | sgRNA_ID_05327 | EEF2   | 4.0125 | 0 |
| 8   | sgRNA_ID_37780 | TRNT1  | 3.8698 | 0 |
| 334 | sgRNA_ID_59548 | NKAIN4 | 3.7323 | 0 |
| 11  | sgRNA_ID_20083 | VARS   | 3.6951 | 0 |
| 239 | sgRNA_ID_20408 | YWHAZ  | 3.6523 | 0 |
| 4   | sgRNA_ID_02325 | CARS   | 3.6411 | 0 |

### 3) VolcanoView for positive selected genes

```
p1 = my_VolcanoView(dd.rra[dd.rra$LFC >=0, ], x = "LFC", y = "FDR", Label = "Official", top=20)
p1 <- p1 + xlim(0,NA)
print(p1)
```

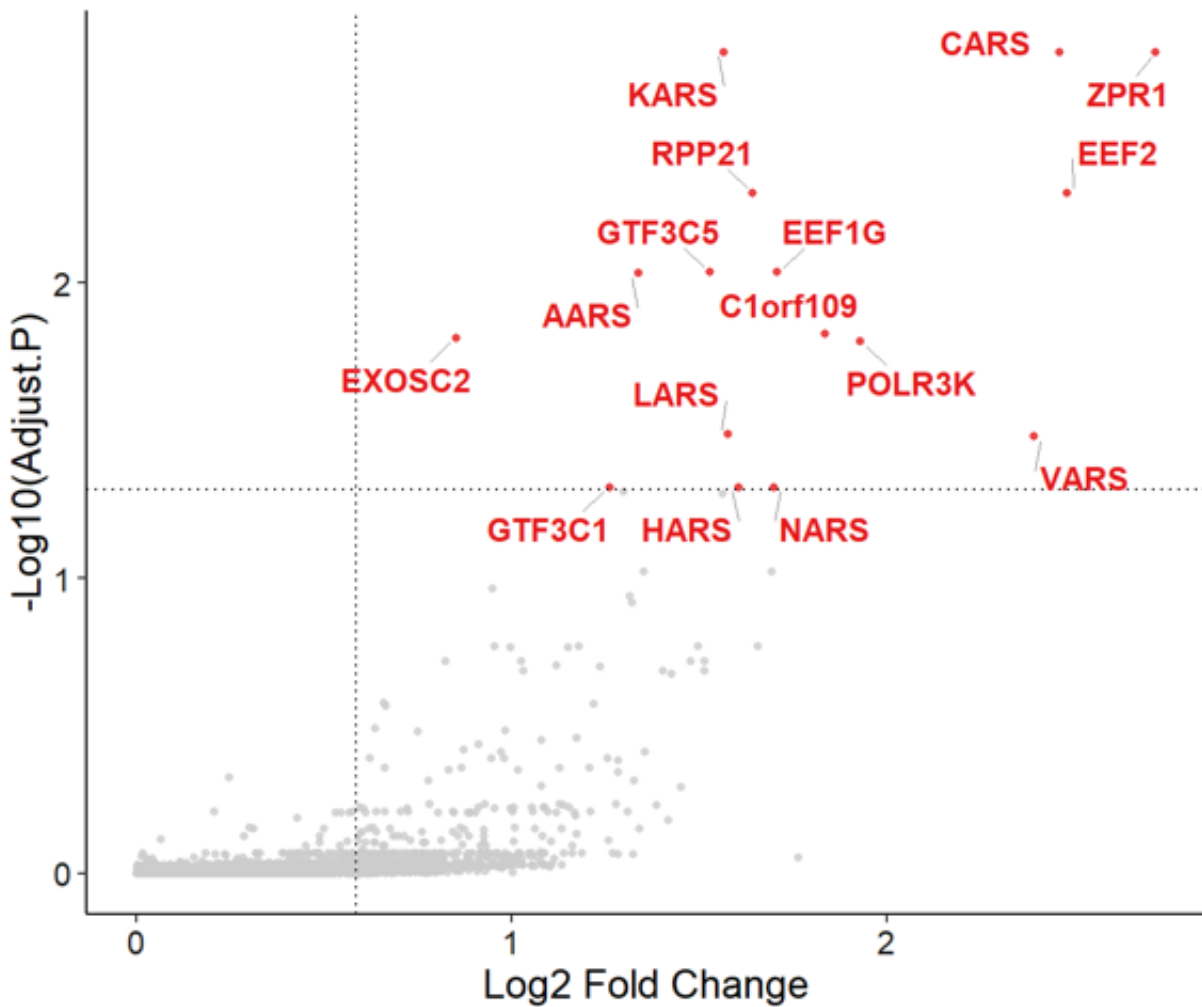

#### 4) $-\log_{10}(\text{RRAscore})$ and $-\log_{10}(\text{pos.fdr})$ plots

```
df <- rra.gene_summary[,c('id', 'neg.score', 'neg.fdr', 'neg.lfc', 'pos.score', 'pos.fdr', 'pos.lfc')]

x_cutoff = log2(1.5); y_cutoff = 0.05
df$group="NoSig"
df$group[df[, 'pos.lfc'] > x_cutoff & df[, 'pos.fdr'] < y_cutoff] = "Up"
df$group[df[, 'neg.lfc'] < -x_cutoff & df[, 'neg.fdr'] < y_cutoff] = "Down"
df$group <- as.factor(df$group)
levels(df$group) <- c("NoSig", "Up", "Down")
kable(table(df$group)) %>% kable_styling(full_width = F)
```

| Var1  | Freq  |
|-------|-------|
| NoSig | 20096 |
| Up    | 16    |

Down 0

```

df[, c('neg.fdr', 'pos.fdr')] = -log10(df[, c('neg.fdr', 'pos.fdr')])
df[, c('neg.score', 'pos.score')] = -log10(df[, c('neg.score', 'pos.score')])

mycolour=c("NoSig"="gray80", "Up"="#e41a1c", "Down"="#377eb8")

# Sort gene symbol in an alphabetical order
df = df[order(df$id),]
df$GeneOrder = c(1:nrow(df))

df$Label = as.character(df$id)
idx_up = which(df$group=="Up")
idx_down = which(df$group=="Down")
idx = unique(idx_up, idx_down)
df$Label[setdiff(1:nrow(df), idx)] = ""
df$Label = factor(df$Label, levels = setdiff(unique(df$Label), ""))

# -log10 RRA score plot
p_sc = ggplot(df, aes(x=GeneOrder, y=pos.score, colour=group, fill=group))
p_sc = p_sc + geom_jitter(position = "jitter", show.legend = FALSE, alpha=0.8, size =
1)
p_sc = p_sc + theme(text = element_text(colour="black",size = 14, family = "Helvetica
"),
                    plot.title = element_text(hjust = 0.5, size=16),
                    axis.text = element_text(colour="gray10"))
p_sc = p_sc + theme(axis.line = element_line(size=0.5, colour = "black"),
                    panel.grid.major = element_blank(), panel.grid.minor = element_blank(),
                    panel.border = element_blank(), panel.background = element_blank())
p_sc = p_sc + labs(x='Gene', y='-log10(RRA score)', title='')
p_sc = p_sc + geom_text_repel(aes(x=df[idx,'GeneOrder'], y=df[idx,'pos.score'], label
= Label), data=df[idx,],
                             fontface = 'bold', size = 4,
                             box.padding = unit(0.4, "lines"), segment.colo
r = 'grey50',
                             point.padding = unit(0.3, "lines"), segment.si
ze = 0.3)
p_sc = p_sc + scale_color_manual(values=mycolour)
p_sc = p_sc + scale_fill_manual(values=mycolour)
p_sc = p_sc + theme(legend.position = "none")
p_sc

```

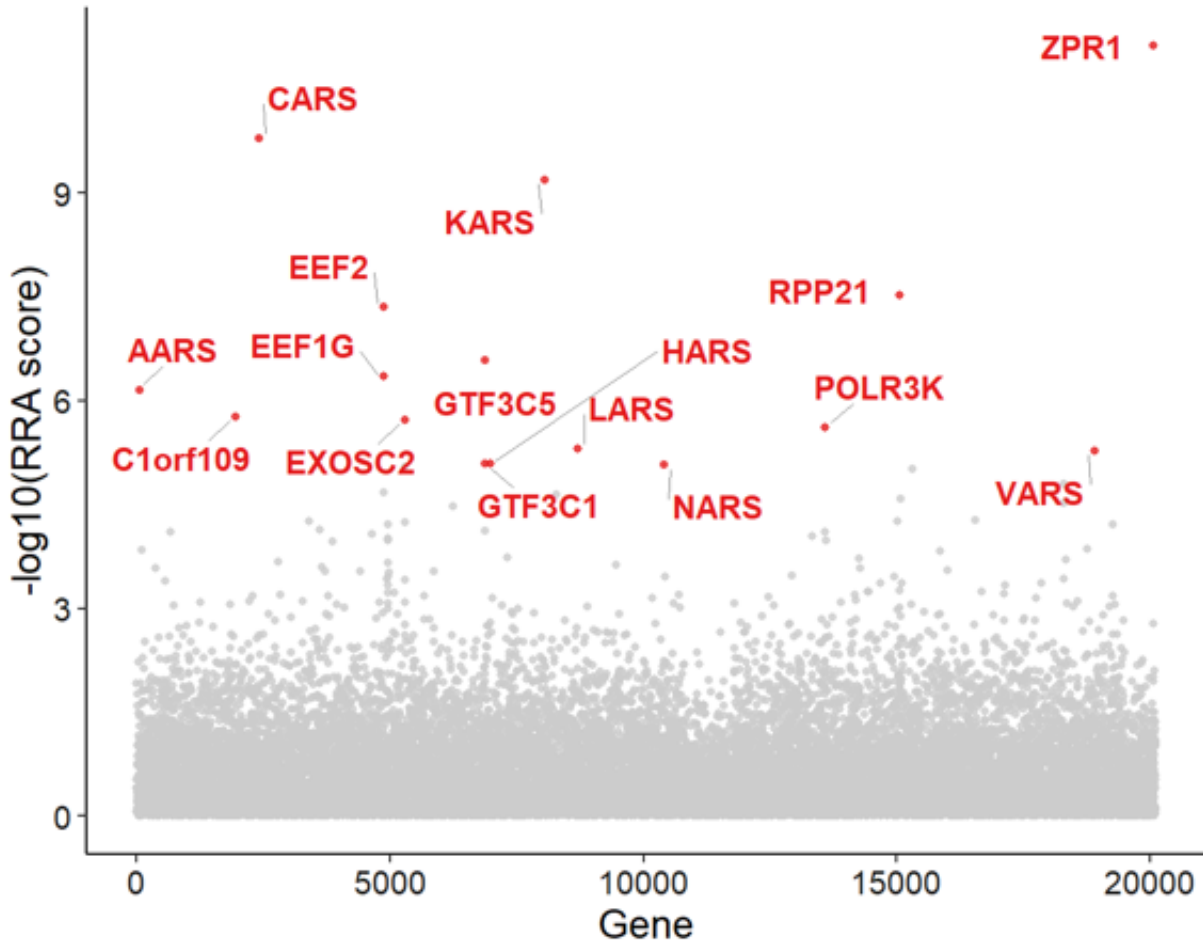



```
# -log10 pos.fdr plot
p_fdr = ggplot(df, aes(x=GeneOrder, y=pos.fdr, colour=group, fill=group))
p_fdr = p_fdr + geom_jitter(position = "jitter", show.legend = FALSE, alpha=0.8, size
= 1)
p_fdr = p_fdr + theme(text = element_text(colour="black",size = 14, family = "Helveti
ca"),
    plot.title = element_text(hjust = 0.5, size=16),
    axis.text = element_text(colour="gray10"))
p_fdr = p_fdr + theme(axis.line = element_line(size=0.5, colour = "black"),
    panel.grid.major = element_blank(), panel.grid.minor = element_blank(),
    panel.border = element_blank(), panel.background = element_blank())
p_fdr = p_fdr + labs(x='Gene', y='-log10(pos.fdr)', title='')
p_fdr = p_fdr + geom_text_repel(aes(x=df[idx,'GeneOrder'], y=df[idx,'pos.fdr'], label
= Label), data=df[idx,],
    fontface = 'bold', size = 4,
    box.padding = unit(0.4, "lines"), segment.colo
r = 'grey50',
    point.padding = unit(0.3, "lines"), segment.si
ze = 0.3)
p_fdr = p_fdr + scale_color_manual(values=mycolour)
p_fdr = p_fdr + scale_fill_manual(values=mycolour)
p_fdr = p_fdr + theme(legend.position = "none")
p_fdr
```

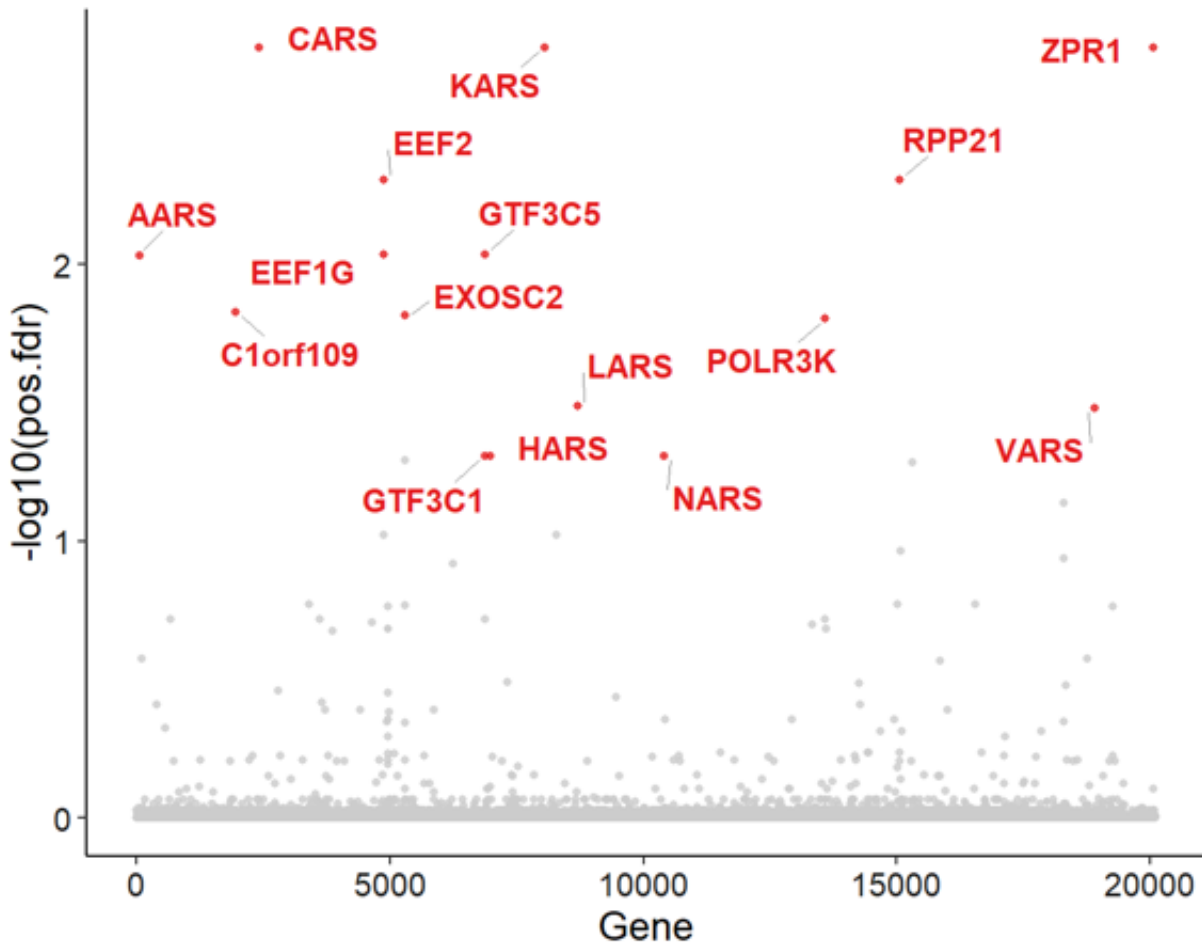

## 5) RankView to visualize top positive and negative selected genes

```
geneList= dd.rra$LFC
names(geneList) = dd.rra$Official
p4 = RankView(geneList)
p4 = p4 + labs(x = "Log2 Fold Change")
print(p4)
```

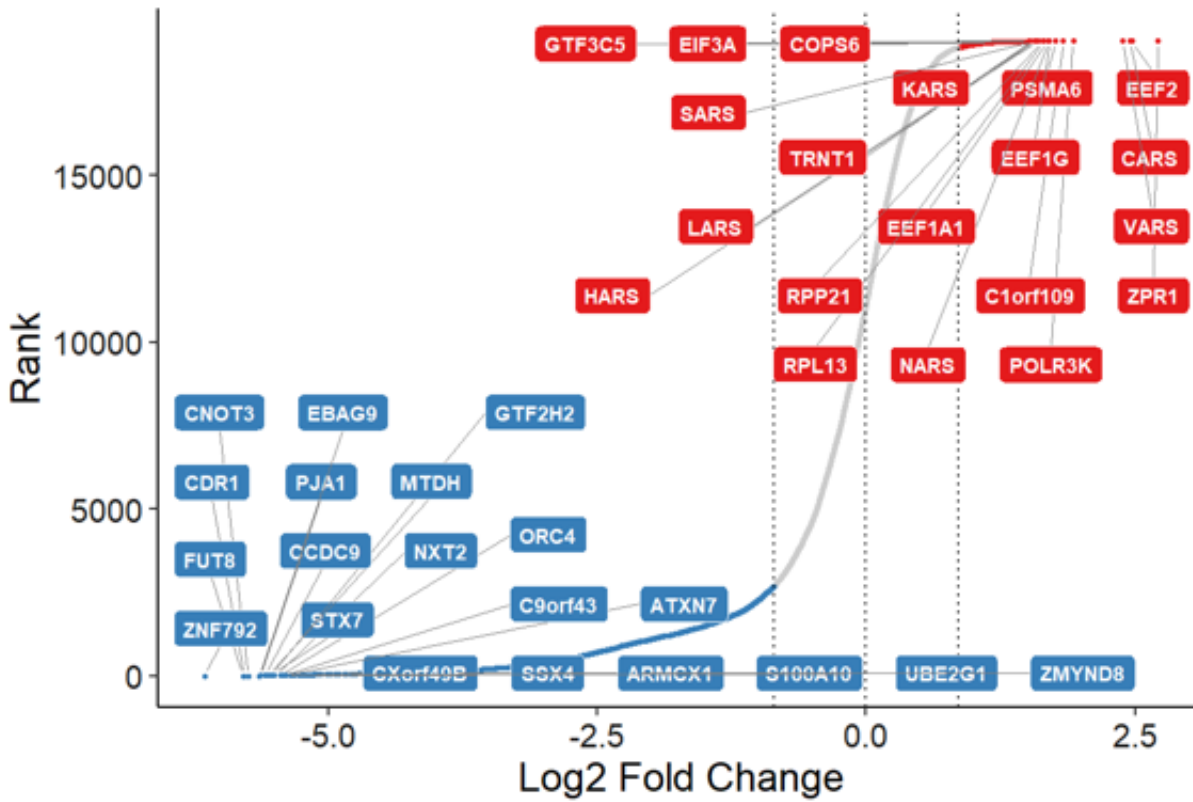

```

#positive selection only
no_neg <- sum(dd.rra$LFC<0)
p4 <- p4 + xlim(0,NA) + ylim(no_neg, NA)
print(p4)

```

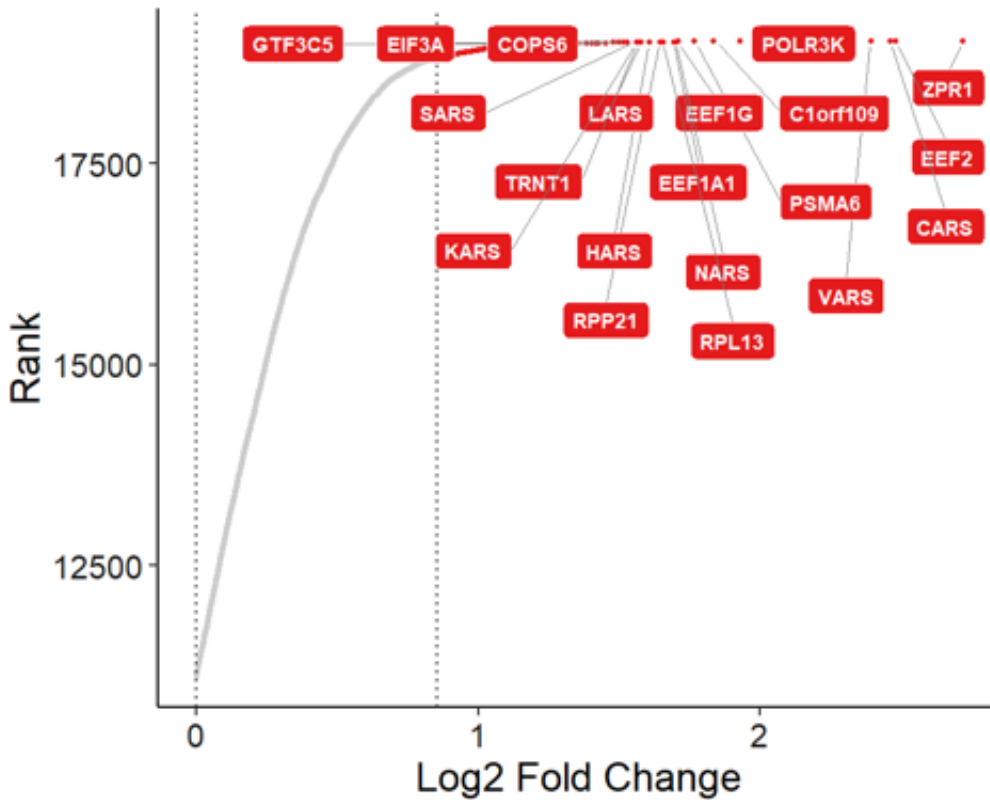

## 6) Enrichment analysis(GSEA, Gene Set Enrichment Analysis)

```
universe = dd.rra$EntrezID
geneList= dd.rra$LFC
names(geneList) = universe
```

```
enrich = enrich.GSE(geneList=geneList, keytype = "Entrez", type = "All", organism = "
hsa", pvalueCutoff = 1, pAdjustMethod = "BH",limit = c(3, 100), gmtpath = NA)
```

### 6-a) Visualize selected genes in enriched genesets

```
my_EnrichedGeneView(as.data.frame(enrich), geneList, keytype = "Entrez", gene_cutoff
= c(-log2(1.5), log2(1.5)), top = 5, bottom = 5, charLength = 40) + theme(text = elem
ent_text(colour="black",size = 13, family = "Helvetica"), axis.text.x = element_text(
color = "black", size = 10)) + labs(x=NULL, y=NULL, color = "Gene score", size = "Log
P")
```

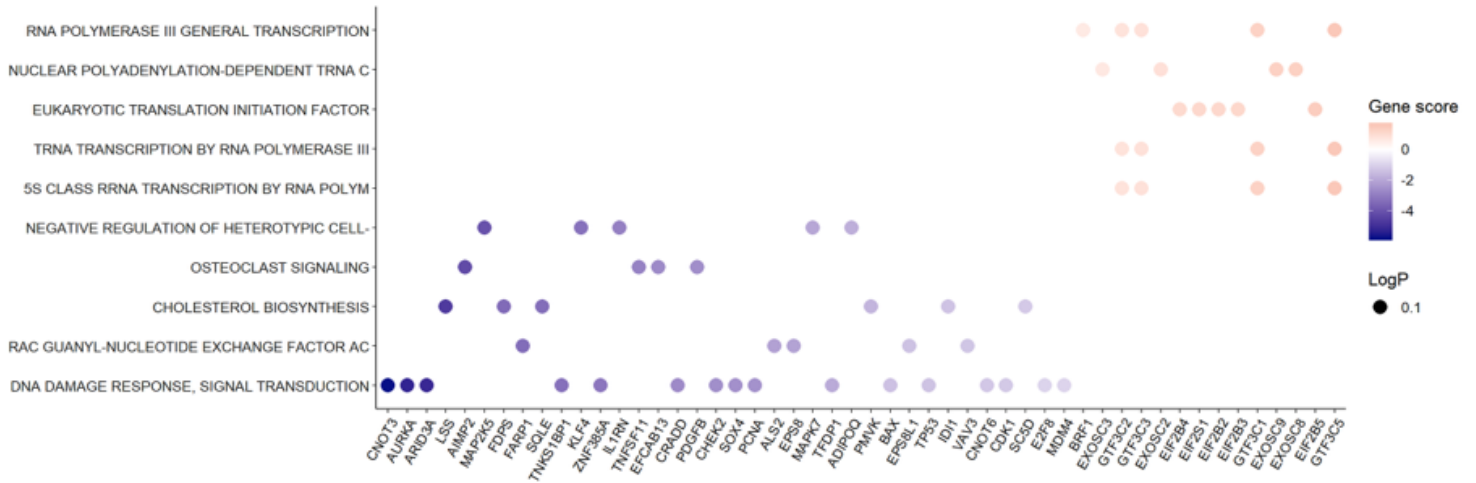

### 6-b) Grid plot for enriched terms in GSEA

```
#EnrichedGSEView(as.data.frame(enrich), decreasing = FALSE, plotTitle = NULL, type = "All", termNum = 15, charLength = 40)
EnrichedGSEView(as.data.frame(enrich), decreasing = TRUE, plotTitle = NULL, type = "All", termNum = 15, charLength = 40)
```

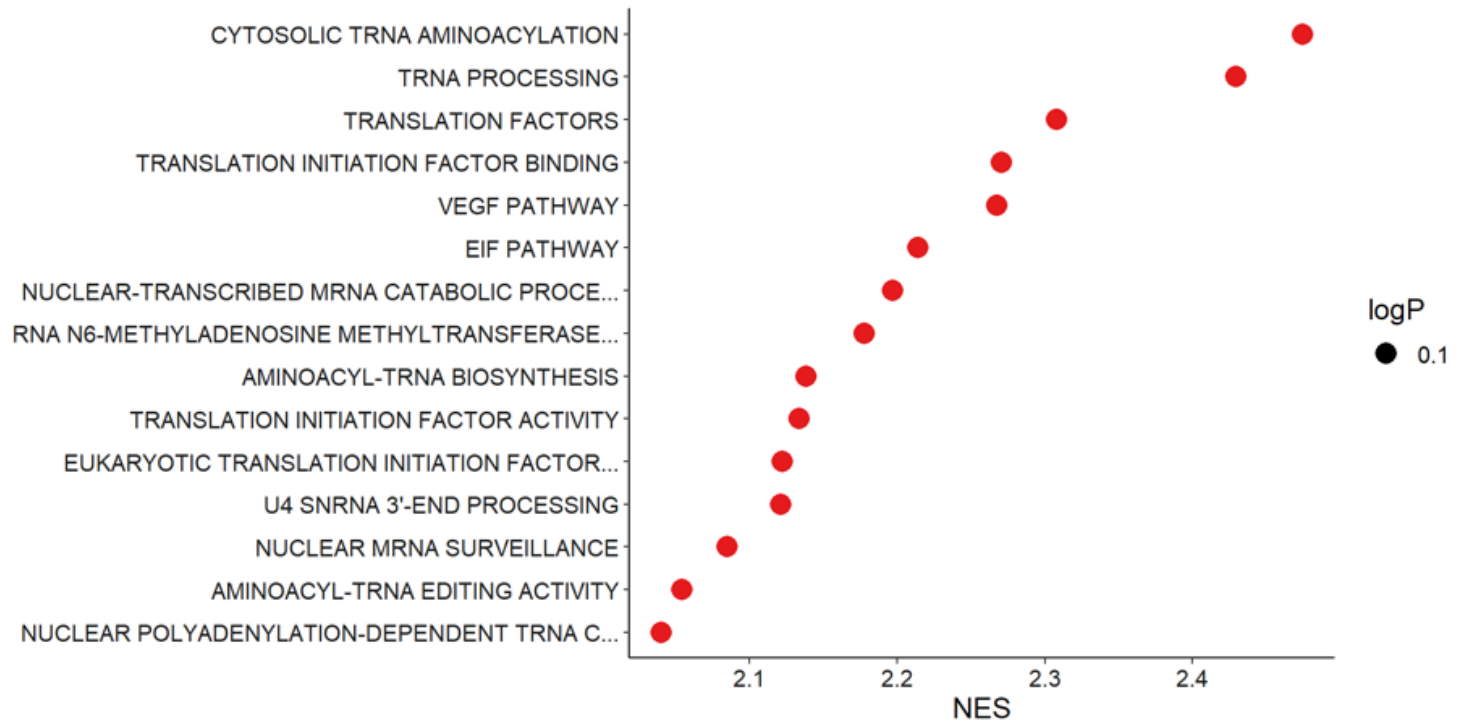

### 7) Functional analysis of selected genes (ORT, Over-Representing Test)

```
#universe = dd$EntrezID
#geneList = dd$LFC; names(geneList) = dd$EntrezID
lfcCutoff <- c(-1,1)
idx1 = (dd.rra$LFC<lfcCutoff[1] & dd.rra$FDR<0.30) ; idx2 = (dd.rra$LFC>lfcCutoff[2]
& dd.rra$FDR<0.30)

#positive selected genes
dd.rra$Official[idx2]
```

```
## [1] ZPR1      EEF2      CARS      VARS      POLR3K    Clorf109  EEF1G
## [8] NARS      EEF1A1    RPL13     RPP21     HARS      LARS      TRNT1
## [15] KARS      SARS      GTF3C5    EIF3A     COPS6     CLP1      POLR3B
## [22] CSTF3     POP7      KIAA1429  AARS      GARS      TRMT112   EXOSC8
## [29] GTF3C1    PKMYT1    ABCF1     SPATA5    EIF3F     DPH3      EIF2B4
## [36] ANAPC11
## 20112 Levels: 1-Dec 1-Mar 1-Sep 10-Mar 10-Sep 11-Mar 11-Sep 12-Sep ... ZZZ3
```

```
kegg.pos = enrich.ORT(geneList=geneList[idx2], universe=universe, keytype = "Entrez",
type = "CORUM+GOBP+GOMF+GOCC+KEGG", organism="hsa", pvalueCutoff=1, pAdjustMethod = "
BH", limit = c(3, 100), gmtpath = NA)
```

## 7-a) Grid plot for positively enriched terms

```
EnrichedView(kegg.pos@result, top = 5) + labs(title = "Enrichment: pos")
```

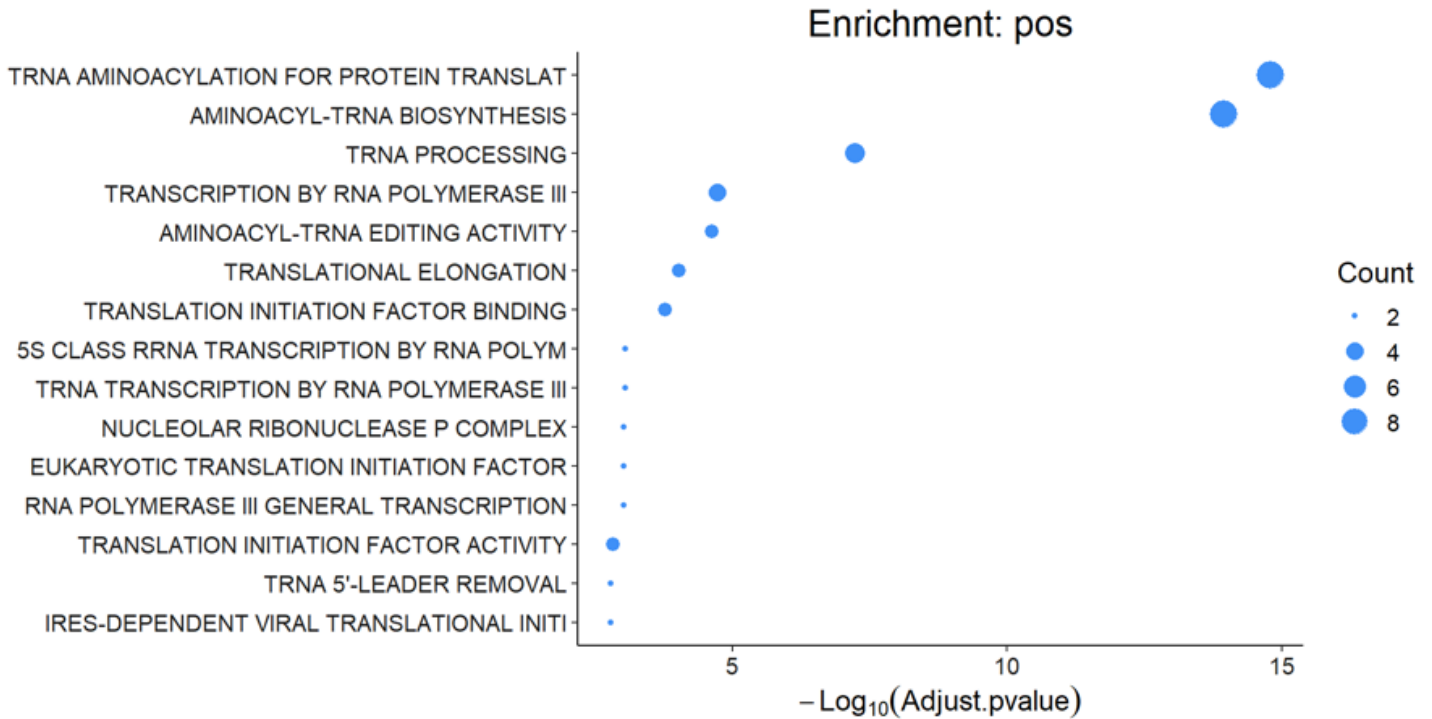

### 7-b) Visualize selected genes in Top-10 enriched genesets

```
my_EnrichedGeneView(kegg.pos@result, geneList, keytype = "Entrez", gene_cutoff = lfcCu
tofff, top = 10, bottom = 0) + theme(text = element_text(colour="black",size = 13, fam
ily = "Helvetica"))
```

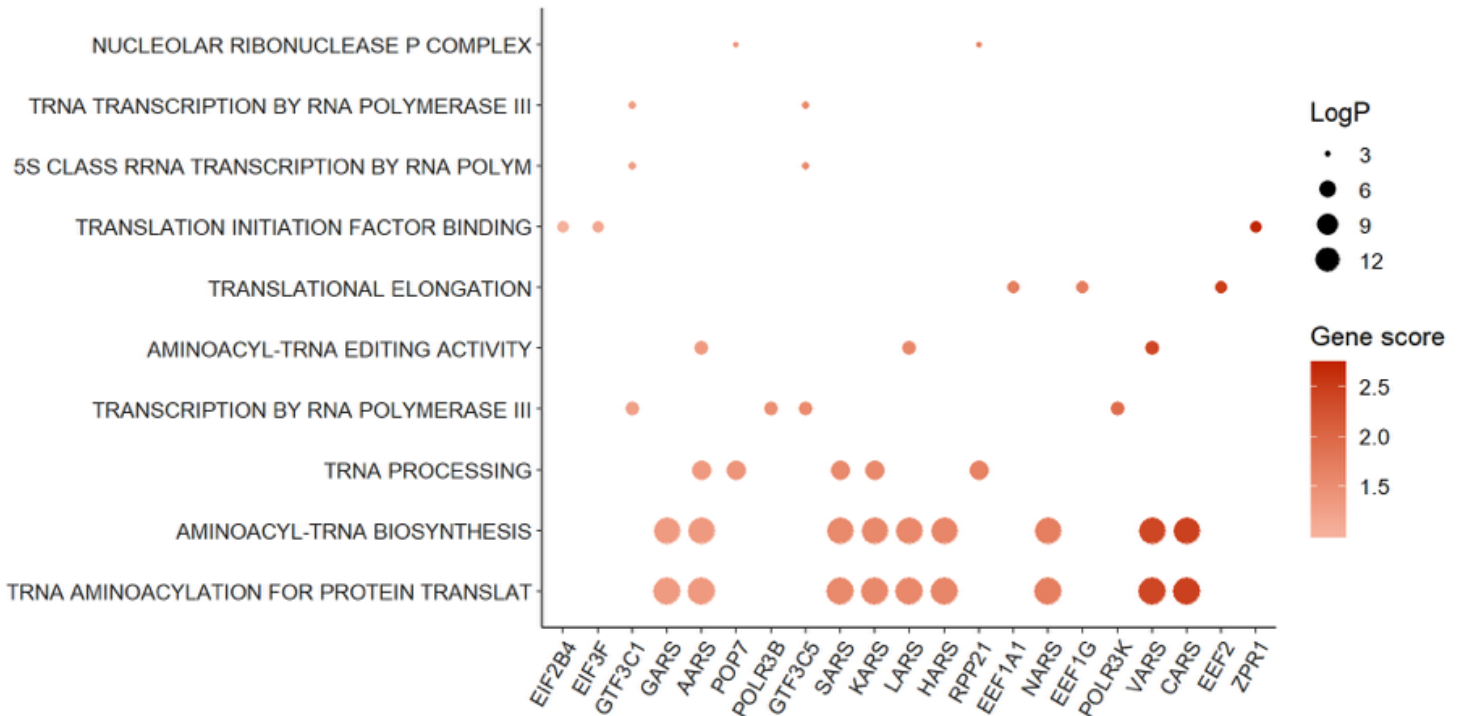

For GSE analysis, no significantly enriched pathway is detected. For functional analysis(Over-Representing Test) of genes selected by criteria of (LFC>1 & FDR<0.30), 36 genes are found significantly enriched in the A01 samples, compared to the A03 samples. The functions enriched by the 36 genes are mainly related to tRNA and translation, and some others.

## 2. A02\_vs\_A03 comparison

### 1) Load gene and sgrna summary data in MAGeCK RRA results

```
rra.gene_summary = read.table("Run056_A02vsA03.gene_summary.txt", sep='\t', header=TRUE)
kable(head(rra.gene_summary)) %>% kable_styling() %>% scroll_box(width = "100%")
```

| id      | num | neg.score | neg.p.value | neg.fdr | neg.rank | neg.goodsgrna | neg.lfc | pos.sco |
|---------|-----|-----------|-------------|---------|----------|---------------|---------|---------|
| MAP3K10 | 4   | 1.10e-05  | 0.0000480   | 0.29648 | 1        | 4             | -5.9462 | 0.9635  |
| CTDSP1  | 4   | 1.73e-05  | 0.0000756   | 0.29648 | 2        | 3             | -2.1675 | 0.5017  |
| CAMKK1  | 4   | 1.81e-05  | 0.0000795   | 0.29648 | 3        | 2             | -3.4280 | 0.8894  |
| GNS     | 4   | 2.13e-05  | 0.0000953   | 0.29648 | 4        | 4             | -4.8297 | 0.9682  |
| ANO5    | 4   | 2.56e-05  | 0.0001140   | 0.29648 | 5        | 3             | -2.6450 | 0.8488  |
| TAOK1   | 4   | 2.58e-05  | 0.0001145   | 0.29648 | 6        | 2             | -2.5611 | 0.1393  |

```
rra.sgrna_summary = read.table("Run056_A02vsA03.sgrna_summary.txt", sep='\t', header = TRUE)
kable(head(rra.sgrna_summary)) %>% kable_styling() %>% scroll_box(width = "100%")
```

| sgrna          | Gene | control_count | treatment_count | control_mean | treat_mean | LFC    |
|----------------|------|---------------|-----------------|--------------|------------|--------|
| sgRNA_ID_34403 | GLCE | 570.63/571    | 25495/17753     | 570.8200     | 21275.00   | 5.2175 |



|                |        |               |               |          |         |        |
|----------------|--------|---------------|---------------|----------|---------|--------|
| sgRNA_ID_34404 | GLCE   | 564.63/613.8  | 10125/7827.4  | 588.7000 | 8902.50 | 3.9163 |
| sgRNA_ID_47270 | TSPYL2 | 0/17.303      | 876.5/66.14   | 1.2192   | 240.87  | 6.7680 |
| sgRNA_ID_16406 | RPL28  | 233.26/298.7  | 2804.4/3441.9 | 263.9600 | 3106.80 | 3.5521 |
| sgRNA_ID_06971 | GCG    | 362.4/377.93  | 18647/666.69  | 370.0900 | 3526.00 | 3.2486 |
| sgRNA_ID_29878 | RAB35  | 329.37/369.74 | 2524.9/4083.9 | 348.9700 | 3211.20 | 3.1982 |

## 2) Top-10 genes and sgRNAs for positive selection

```
dd.rra = ReadRRA(rra.gene_summary, organism = "hsa")
dd.rra <- dd.rra[order(-dd.rra$LFC),]
kable(head(dd.rra, 10)) %>% kable_styling(full_width = F)
```

|        | Official | EntrezID | LFC    | FDR      |
|--------|----------|----------|--------|----------|
| 26035  | GLCE     | 26035    | 3.3772 | 0.004950 |
| 6158   | RPL28    | 6158     | 2.6289 | 0.018152 |
| 11021  | RAB35    | 11021    | 2.4239 | 0.012376 |
| 382    | ARF6     | 382      | 1.9828 | 0.514144 |
| 5438   | POLR2I   | 5438     | 1.9796 | 0.921571 |
| 5901   | RAN      | 5901     | 1.8573 | 0.320545 |
| 3107   | HLA-C    | 3107     | 1.8540 | 0.864242 |
| 431707 | LHX8     | 431707   | 1.8510 | 0.864242 |
| 51477  | ISYNA1   | 51477    | 1.6381 | 0.899025 |
| 5148   | PDE6G    | 5148     | 1.5576 | 0.864242 |

```
dd.sgrna = ReadsgRRA(rra.sgrna_summary)
dd.sgrna <- dd.sgrna[order(-dd.sgrna$LFC),]
kable(head(dd.sgrna,10)) %>% kable_styling(full_width = F)
```

|    | <b>sgrna</b>   | <b>Gene</b> | <b>LFC</b> | <b>FDR</b> |
|----|----------------|-------------|------------|------------|
| 3  | sgRNA_ID_47270 | TSPYL2      | 6.7680     | 0          |
| 8  | sgRNA_ID_14348 | POLE        | 5.3416     | 0          |
| 1  | sgRNA_ID_34403 | GLCE        | 5.2175     | 0          |
| 2  | sgRNA_ID_34404 | GLCE        | 3.9163     | 0          |
| 11 | sgRNA_ID_10444 | AFF3        | 3.5928     | 0          |
| 4  | sgRNA_ID_16406 | RPL28       | 3.5521     | 0          |
| 16 | sgRNA_ID_16407 | RPL28       | 3.4793     | 0          |
| 9  | sgRNA_ID_18230 | SRPR        | 3.3077     | 0          |
| 5  | sgRNA_ID_06971 | GCG         | 3.2486     | 0          |
| 6  | sgRNA_ID_29878 | RAB35       | 3.1982     | 0          |

### 3) VolcanoView for positive selected genes

```
p1 = my_VolcanoView(dd.rra[dd.rra$LFC >=0, ], x = "LFC", y = "FDR", Label = "Official", top=20)
p1 <- p1 + xlim(0,NA)
print(p1)
```

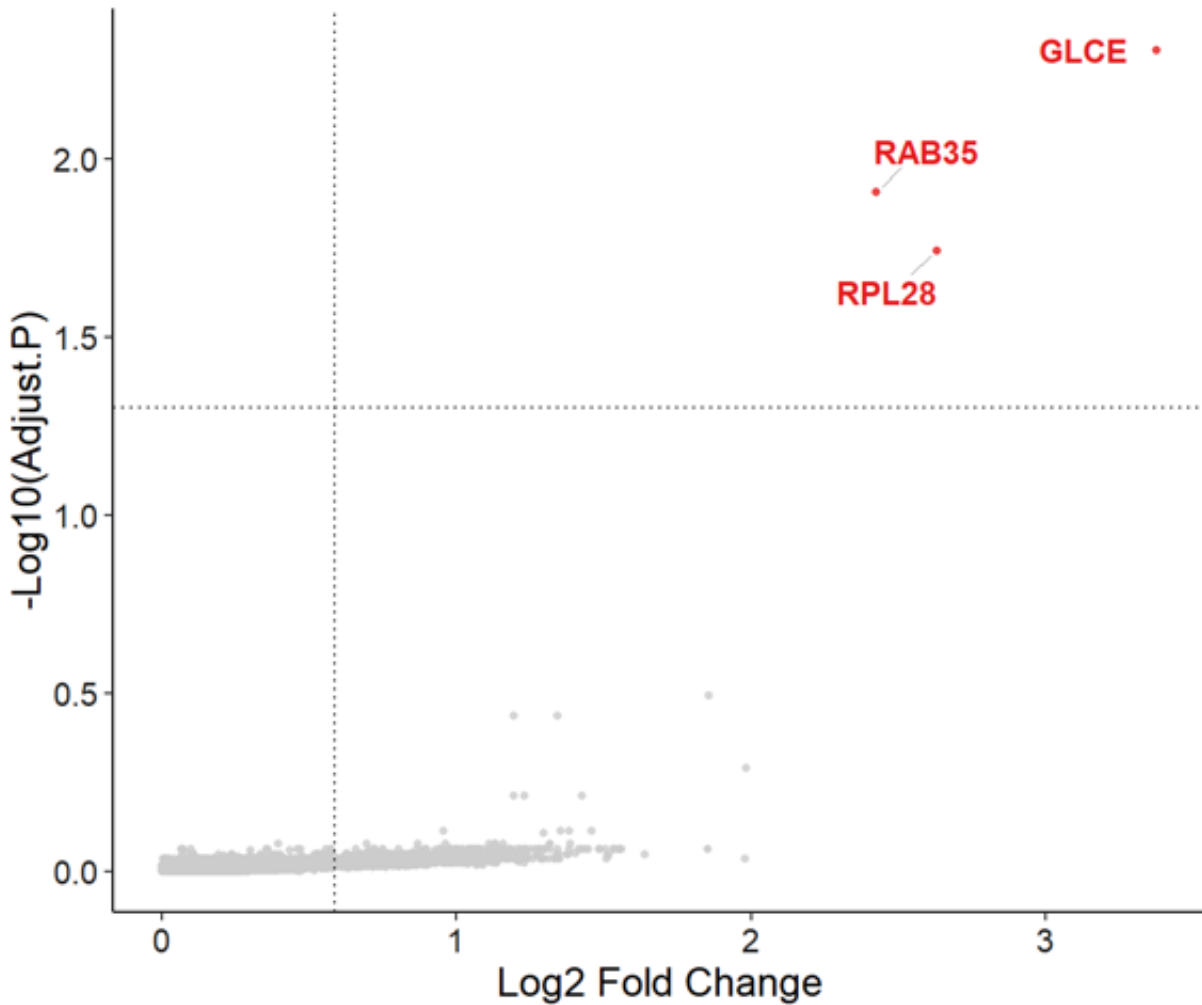

#### 4) -log<sub>10</sub>(RRAscore) and -log<sub>10</sub>(pos.fdr) plots

```
df <- rra.gene_summary[,c('id', 'neg.score', 'neg.fdr', 'neg.lfc', 'pos.score', 'pos.fdr', 'pos.lfc')]

x_cutoff = log2(1.5); y_cutoff = 0.05
df$group="NoSig"
df$group[df[, 'pos.lfc'] > x_cutoff & df[, 'pos.fdr'] < y_cutoff] = "Up"
df$group[df[, 'neg.lfc'] < -x_cutoff & df[, 'neg.fdr'] < y_cutoff] = "Down"
df$group <- as.factor(df$group)
levels(df$group) <- c("NoSig", "Up", "Down")
kable(table(df$group)) %>% kable_styling(full_width = F)
```

| Var1  | Freq  |
|-------|-------|
| NoSig | 20109 |
| Up    | 3     |

Down 0

```

df[, c('neg.fdr', 'pos.fdr')] = -log10(df[, c('neg.fdr', 'pos.fdr')])
df[, c('neg.score', 'pos.score')] = -log10(df[, c('neg.score', 'pos.score')])

mycolour=c("NoSig"="gray80", "Up"="#e41a1c", "Down"="#377eb8")

# Sort gene symbol in an alphabetical order
df = df[order(df$id),]
df$GeneOrder = c(1:nrow(df))

df$Label = as.character(df$id)
idx_up = which(df$group=="Up")
idx_down = which(df$group=="Down")
idx = unique(idx_up, idx_down)
df$Label[setdiff(1:nrow(df), idx)] = ""
df$Label = factor(df$Label, levels = setdiff(unique(df$Label), ""))

# -log10 RRA score plot
p_sc = ggplot(df, aes(x=GeneOrder, y=pos.score, colour=group, fill=group))
p_sc = p_sc + geom_jitter(position = "jitter", show.legend = FALSE, alpha=0.8, size =
1)
p_sc = p_sc + theme(text = element_text(colour="black",size = 14, family = "Helvetica
"),
                    plot.title = element_text(hjust = 0.5, size=16),
                    axis.text = element_text(colour="gray10"))
p_sc = p_sc + theme(axis.line = element_line(size=0.5, colour = "black"),
                    panel.grid.major = element_blank(), panel.grid.minor = element_blank(),
                    panel.border = element_blank(), panel.background = element_blank())
p_sc = p_sc + labs(x='Gene', y='-log10(RRA score)', title='')
p_sc = p_sc + geom_text_repel(aes(x=df[idx,'GeneOrder'], y=df[idx,'pos.score'], label
= Label), data=df[idx,],
                             fontface = 'bold', size = 4,
                             box.padding = unit(0.4, "lines"), segment.colo
r = 'grey50',
                             point.padding = unit(0.3, "lines"), segment.si
ze = 0.3)
p_sc = p_sc + scale_color_manual(values=mycolour)
p_sc = p_sc + scale_fill_manual(values=mycolour)
p_sc = p_sc + theme(legend.position = "none")
p_sc

```

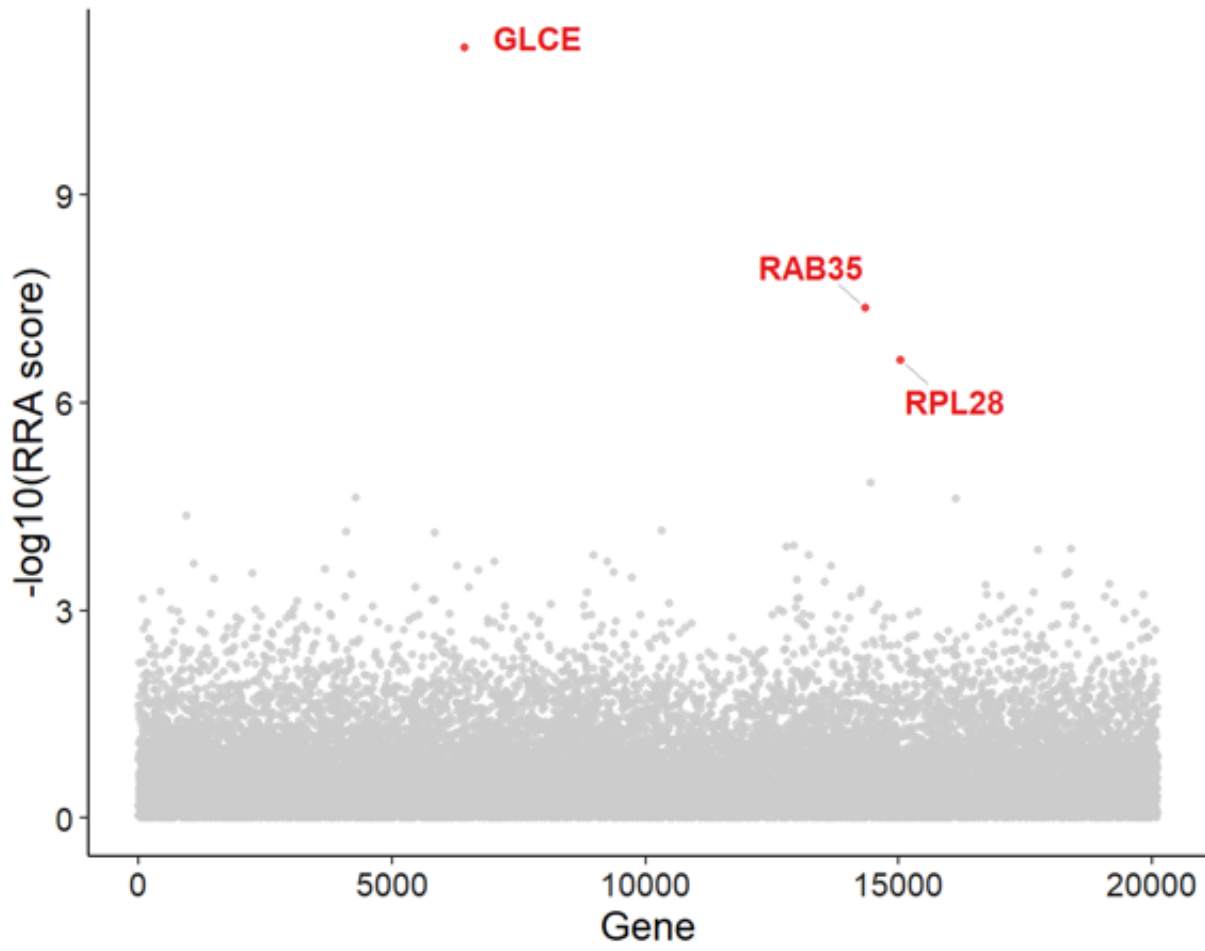

```
# -log10 pos.fdr plot
p_fdr = ggplot(df, aes(x=GeneOrder, y=pos.fdr, colour=group, fill=group))
p_fdr = p_fdr + geom_jitter(position = "jitter", show.legend = FALSE, alpha=0.8, size
= 1)
p_fdr = p_fdr + theme(text = element_text(colour="black",size = 14, family = "Helveti
ca"),
    plot.title = element_text(hjust = 0.5, size=16),
    axis.text = element_text(colour="gray10"))
p_fdr = p_fdr + theme(axis.line = element_line(size=0.5, colour = "black"),
    panel.grid.major = element_blank(), panel.grid.minor = element_blank(),
    panel.border = element_blank(), panel.background = element_blank())
p_fdr = p_fdr + labs(x='Gene', y='-log10(pos.fdr)', title='')
p_fdr = p_fdr + geom_text_repel(aes(x=df[idx,'GeneOrder'], y=df[idx,'pos.fdr'], label
= Label), data=df[idx,],
    fontface = 'bold', size = 4,
    box.padding = unit(0.4, "lines"), segment.colour =
r = 'grey50',
    point.padding = unit(0.3, "lines"), segment.size = 0.3)
p_fdr = p_fdr + scale_color_manual(values=mycolour)
p_fdr = p_fdr + scale_fill_manual(values=mycolour)
p_fdr = p_fdr + theme(legend.position = "none")
p_fdr
```

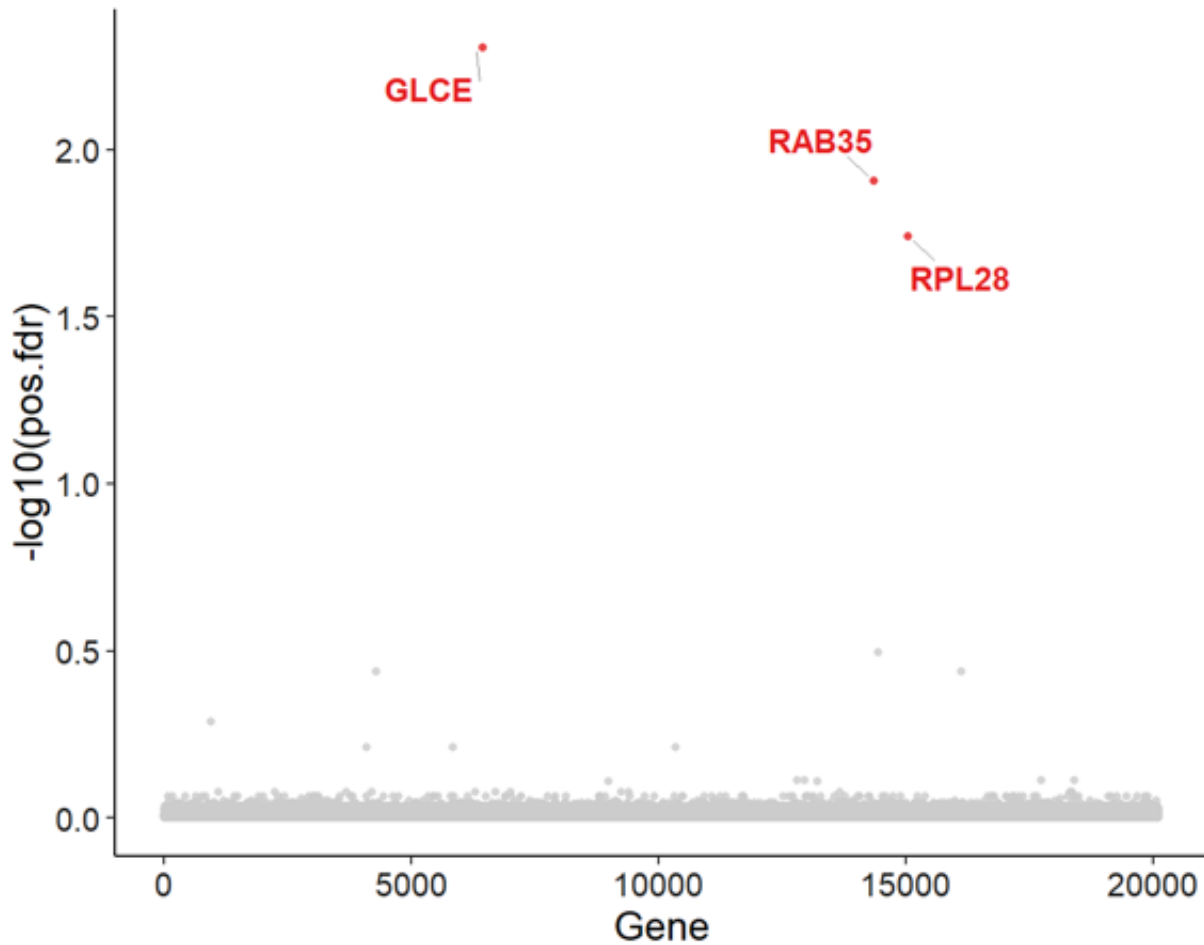

## 5) RankView to visualize top positive and negative selected genes

```
geneList= dd.rra$LFC
names(geneList) = dd.rra$Official
p4 = RankView(geneList)
p4 = p4 + labs(x = "Log2 Fold Change")
print(p4)
```

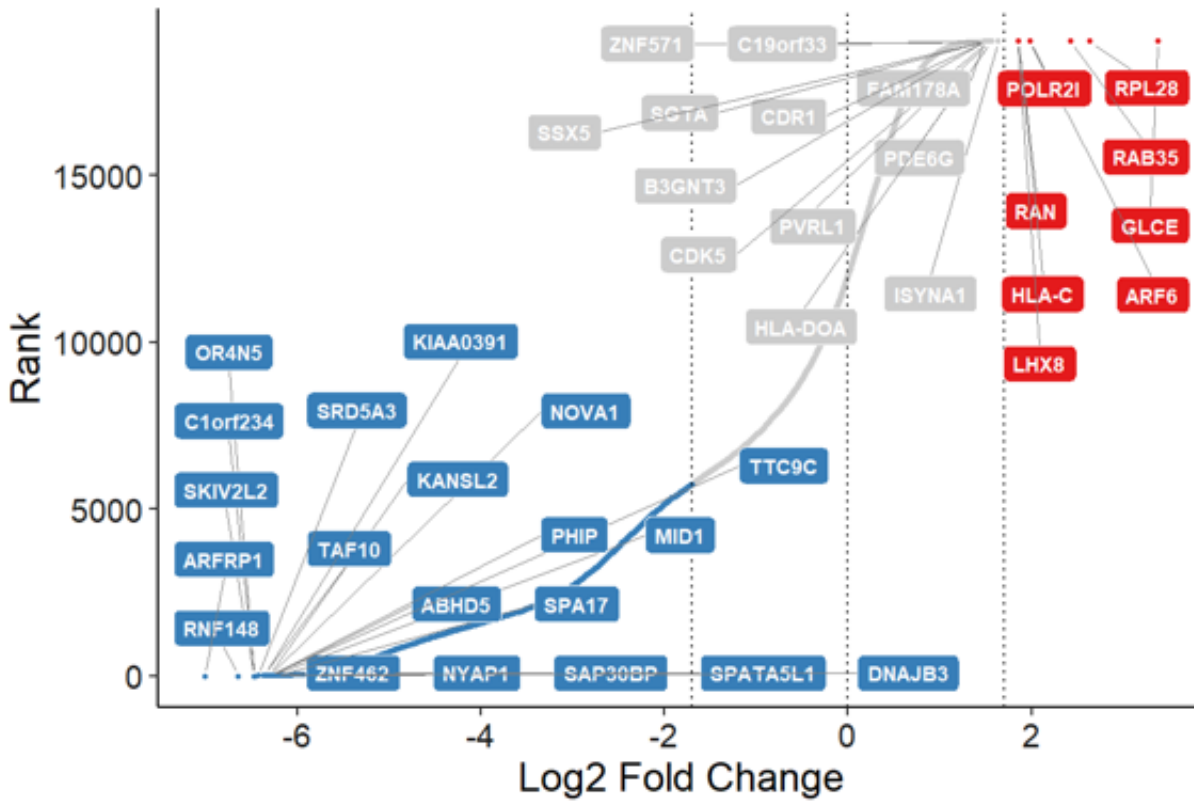

```

#positive selection only
no_neg <- sum(dd.rra$LFCh<0)
p4 <- p4 + xlim(0,NA) + ylim(no_neg, NA)
print(p4)

```



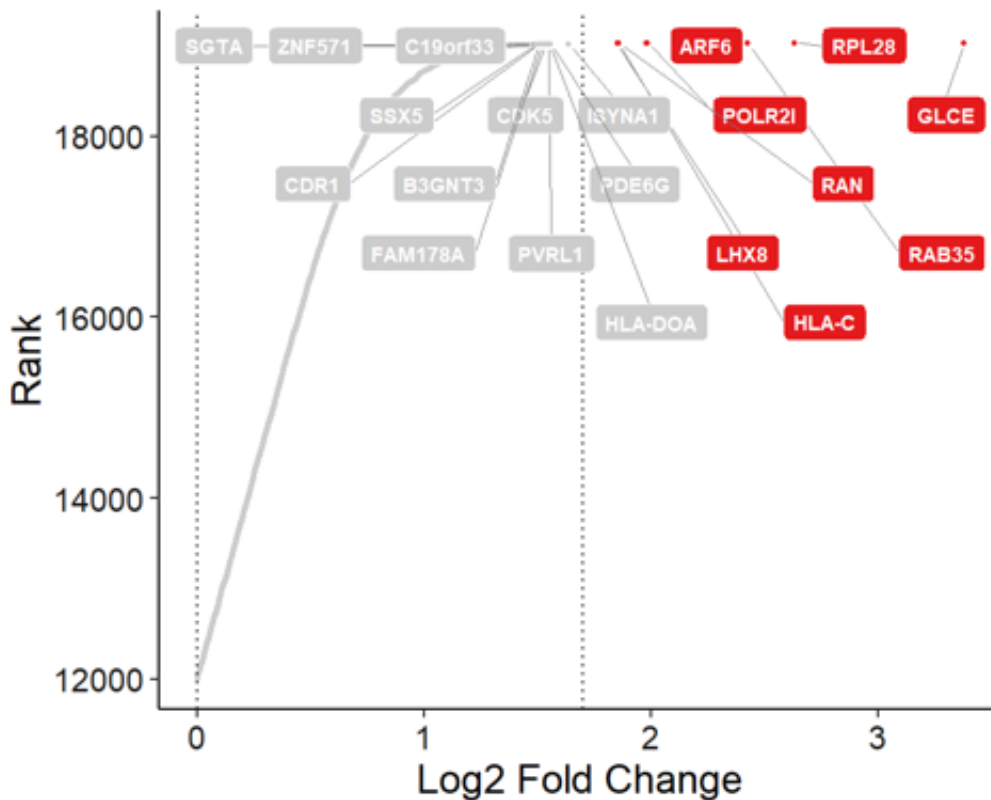

## 6) Enrichment analysis(GSEA, Gene Set Enrichment Analysis)

```
universe = dd.rra$EntrezID
geneList= dd.rra$LFC
names(geneList) = universe
```

```
enrich = enrich.GSE(geneList=geneList, keytype = "Entrez", type = "All", organism = "
hsa", pvalueCutoff = 1, pAdjustMethod = "BH", limit = c(3, 100), gmtpath = NA)
```

### 6-a) Visualize selected genes in enriched genesets

```
my_EnrichedGeneView(as.data.frame(enrich), geneList, keytype = "Entrez", gene_cutoff
= c(-log2(1.5), log2(1.5)), top = 5, bottom = 5, charLength = 40) + theme(text = elem
ent_text(colour="black",size = 13, family = "Helvetica"), axis.text.x = element_text(
color = "black", size = 10)) + labs(x=NULL, y=NULL, color = "Gene score", size = "Log
P")
```

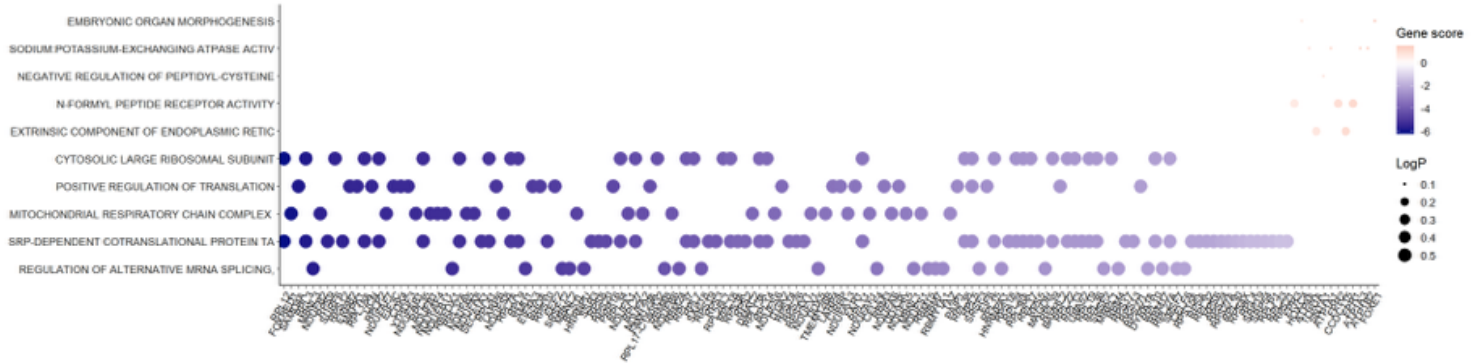

### 6-b) Grid plot for enriched terms in GSEA

```
#EnrichedGSEView(as.data.frame(enrich), decreasing = FALSE, plotTitle = NULL, type = "
All", termNum = 15, charLength = 40)
EnrichedGSEView(as.data.frame(enrich), decreasing = TRUE, plotTitle = NULL, type = "A
ll", termNum = 15, charLength = 40)
```

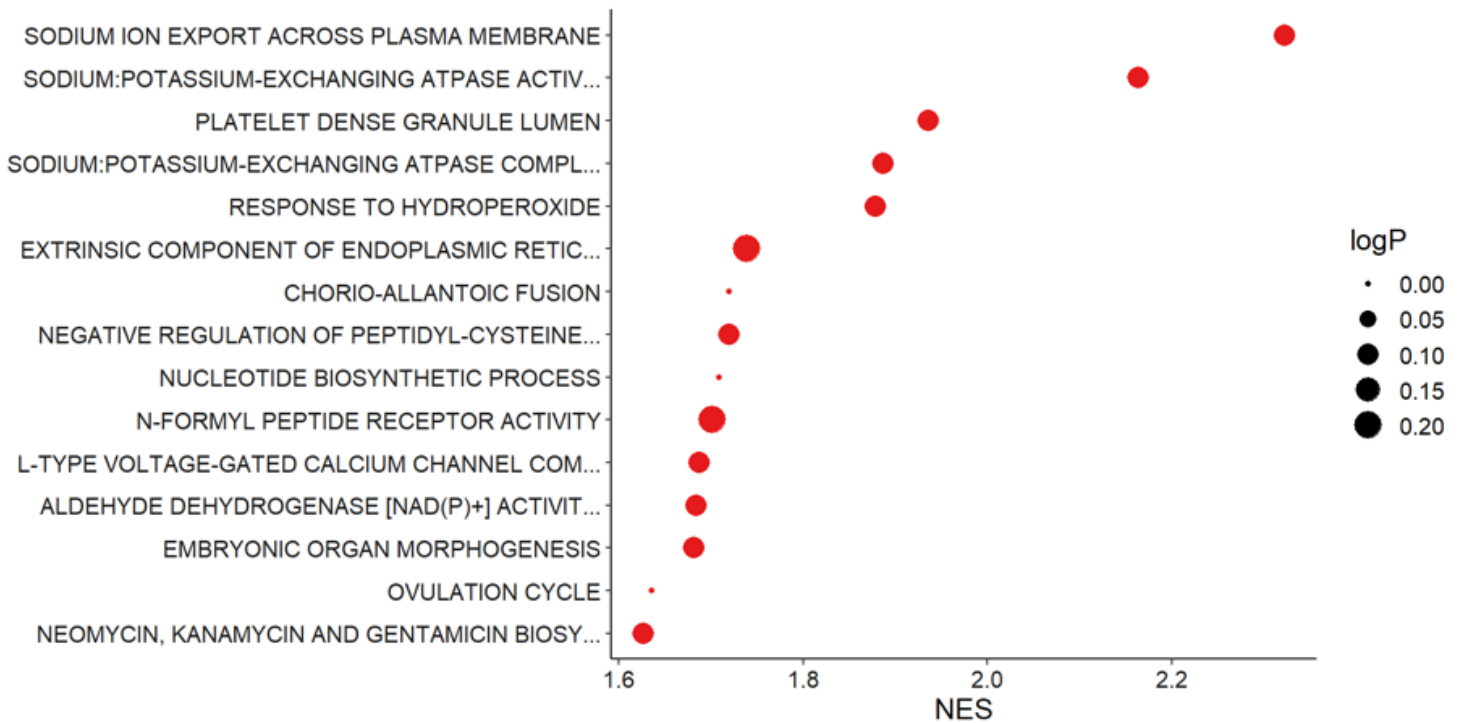

### 7) Functional analysis of selected genes (ORT, Over-Representing Test)

```
#universe = dd$EntrezID
#geneList = dd$LFC; names(geneList) = dd$EntrezID
lfcCutoff <- c(-1,1)
idx1 = (dd.rra$LFC<lfcCutoff[1] & dd.rra$FDR<0.30) ; idx2 = (dd.rra$LFC>lfcCutoff[2]
& dd.rra$FDR<0.30)

#positive selected genes
dd.rra$Official[idx2]
```

```
## [1] GLCE RPL28 RAB35
## 20112 Levels: 1-Dec 1-Mar 1-Sep 10-Mar 10-Sep 11-Mar 11-Sep 12-Sep ... ZZZ3
```

```
kegg.pos = enrich.ORT(geneList=geneList[idx2], universe=universe, keytype = "Entrez",
type = "CORUM+GOBP+GOMF+GOCC+KEGG", organism="hsa", pvalueCutoff=1, pAdjustMethod = "
BH", limit = c(3, 100), gmtpath = NA)
```

## 7-a) Grid plot for positively enriched terms

```
EnrichedView(kegg.pos@result, top = 5) + labs(title = "Enrichment: pos")
```

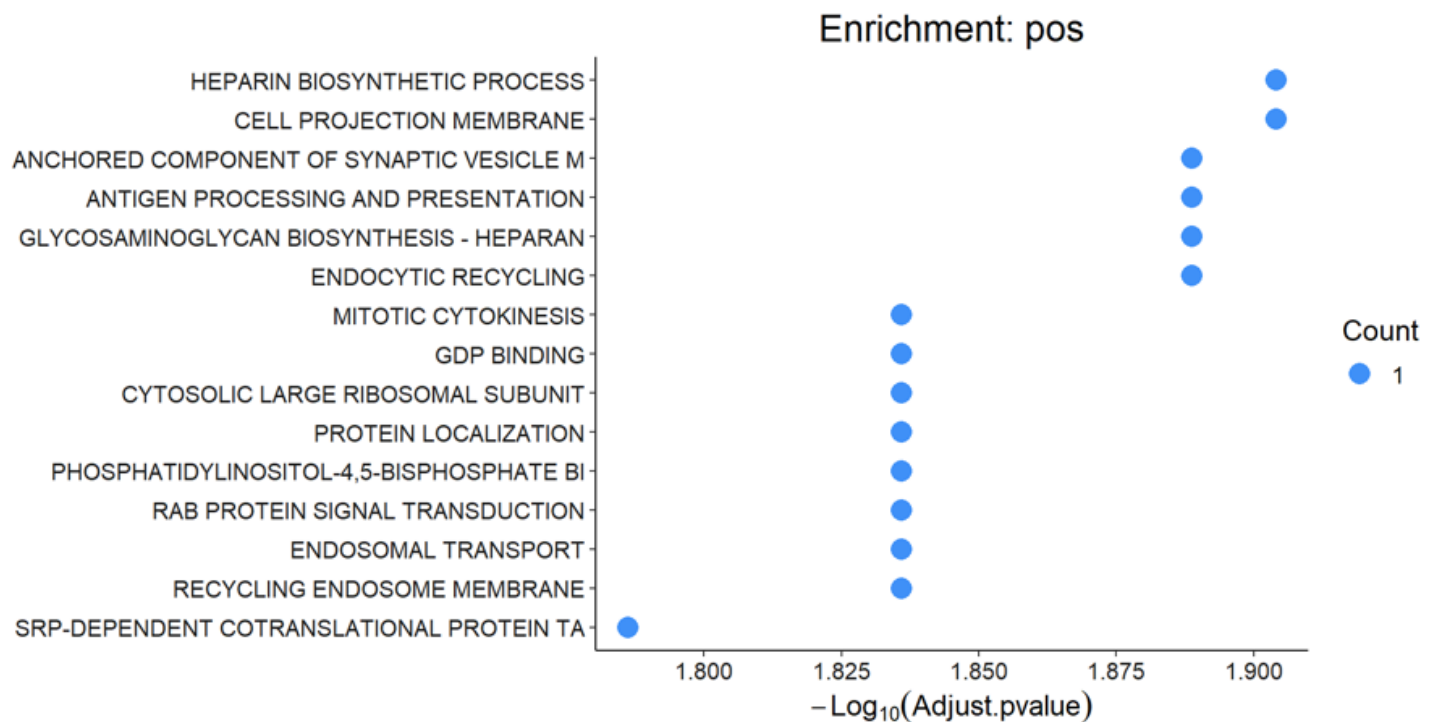

## 7-b) Visualize selected genes in Top-10 enriched genesets

```
my_EnrichedGeneView(kegg.pos@result, geneList, keytype = "Entrez", gene_cutoff = lfcCutoff, top = 10, bottom = 0) + theme(text = element_text(colour="black", size = 13, family = "Helvetica"))
```

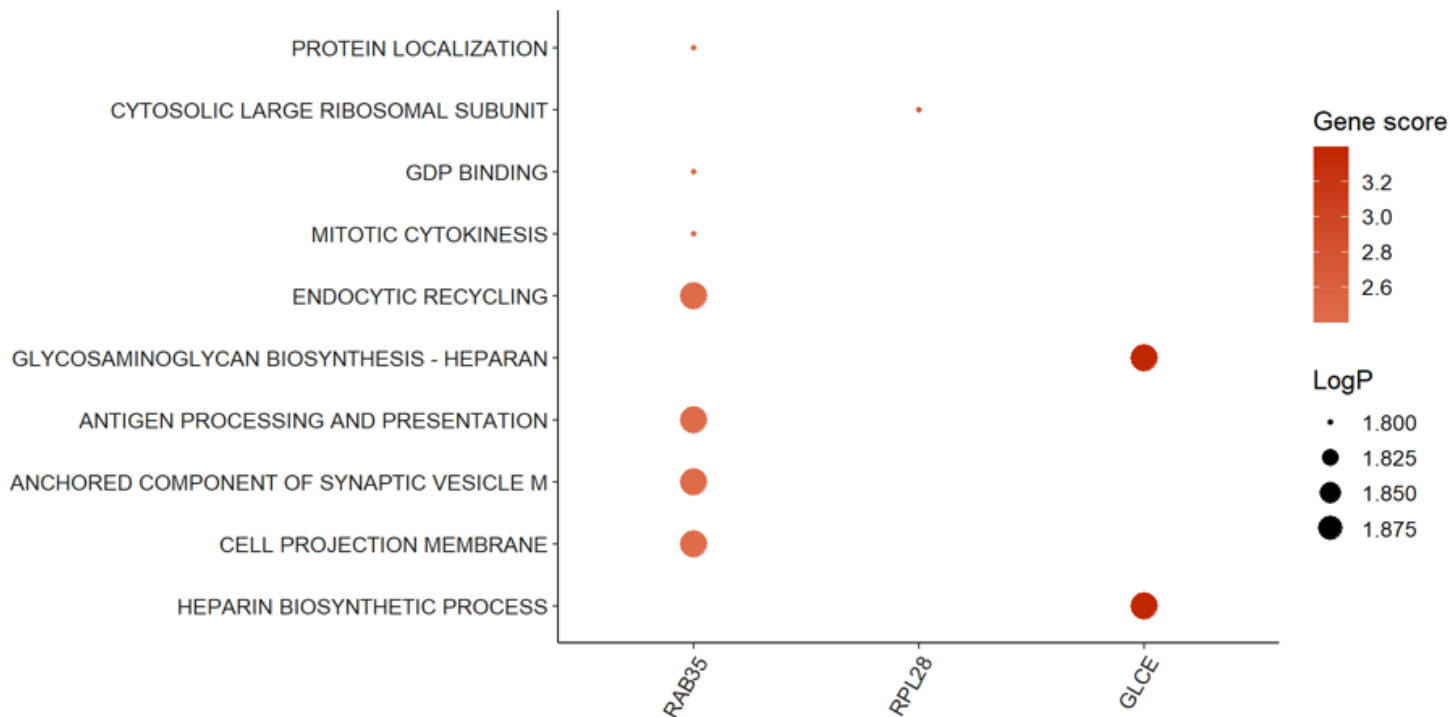

**For GSE analysis, no significantly enriched pathway is detected. For functional analysis (Over-Representing Test) of genes selected by criteria of (LFC>1 & FDR<0.30), 3 genes are found significantly enriched in the A02 samples, compared to the A03 samples. The three genes are GLCE, RPL28, and RAB35.**

=== End of Report ===
